# Supplementary material for: Congestion effect of an annulated tetracyclic thiophene-containing fragment on 18-crown-6 ether: manifestation in complex formation in solution and membrane transfer properties
Source: Royal Society of Chemistry journal article supplement (doi:10.1039/d4nj02414a), 2024-01-01
Supplement: d4nj02414a1.pdf [file d4nj02414a1.pdf]

## Supplementary info

# Congestion effect of an annulated tetracyclic thiophene-containing fragment on 18-crown-6 ether: manifestation in complex formation in solution and membrane transfer properties

Andrey Khoroshutin<sup>a</sup>, Leonid Martynov<sup>b</sup>, Polina Yaltseva<sup>a†</sup>, Evita Kostenko<sup>b</sup>, Dmitry Cheshkov<sup>b</sup>, Anatoliy Botezatu<sup>c</sup>, Anna Moiseeva<sup>a</sup>, Yuri Fedorov<sup>c</sup> and Olga Fedorova<sup>c</sup>

## CONTENTS

|                                                                                                                      |    |
|----------------------------------------------------------------------------------------------------------------------|----|
| 1. NMR spectra.....                                                                                                  | 1  |
| 2. 2D spectra.....                                                                                                   | 4  |
| 3. High-resolution mass-spectrometry of <u>1</u> and <u>2</u> .....                                                  | 7  |
| 4. Titrations.....                                                                                                   | 9  |
| 4.1. NMR titration.....                                                                                              | 9  |
| 4.2. UV-Vis and fluorescence titration.....                                                                          | 13 |
| 5. DOSY experiments on native and complexed <u>CE 1</u> and <u>CE 2</u> .....                                        | 14 |
| 6. Representative conformations of crown ethers <u>1</u> and <u>2</u> .....                                          | 15 |
| 6.1. Generating conformations with dihedral angles close to 0 Deg.....                                               | 15 |
| 6.2. Docking of the aromatic fragment and MMF94 optimization both in vacuo and in CH <sub>3</sub> CN (ε = 38.8)..... | 19 |
| 6.3. Single point energy and NMR chemical shifts calculations.....                                                   | 20 |
| 7. Facilitated ion transfer measurements.....                                                                        | 24 |

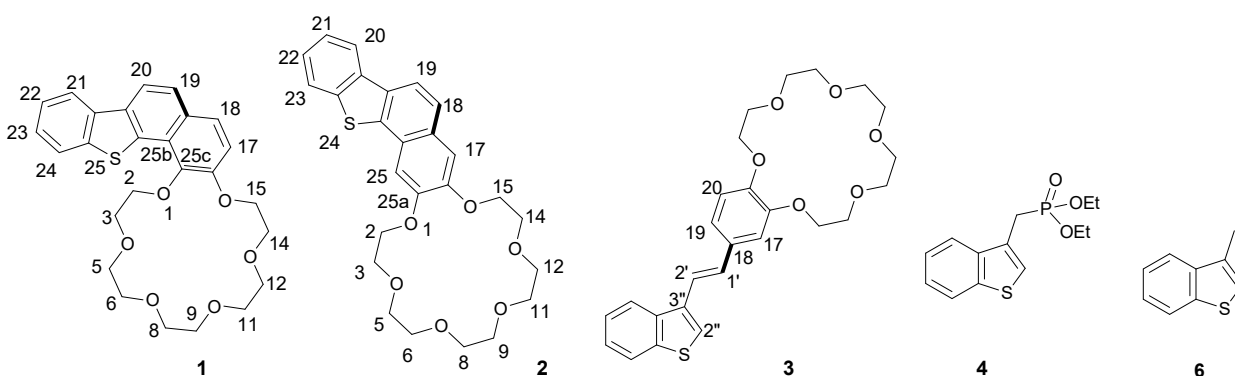

## 1. NMR spectra

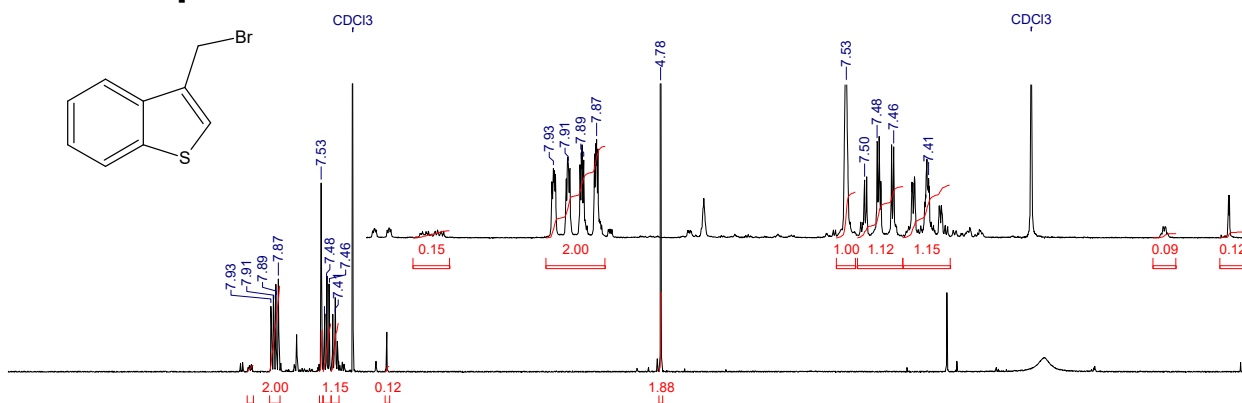

Figure S1. <sup>1</sup>H NMR spectrum (400 MHz, CDCl<sub>3</sub>) of 3-bromomethylbenzothiophene.

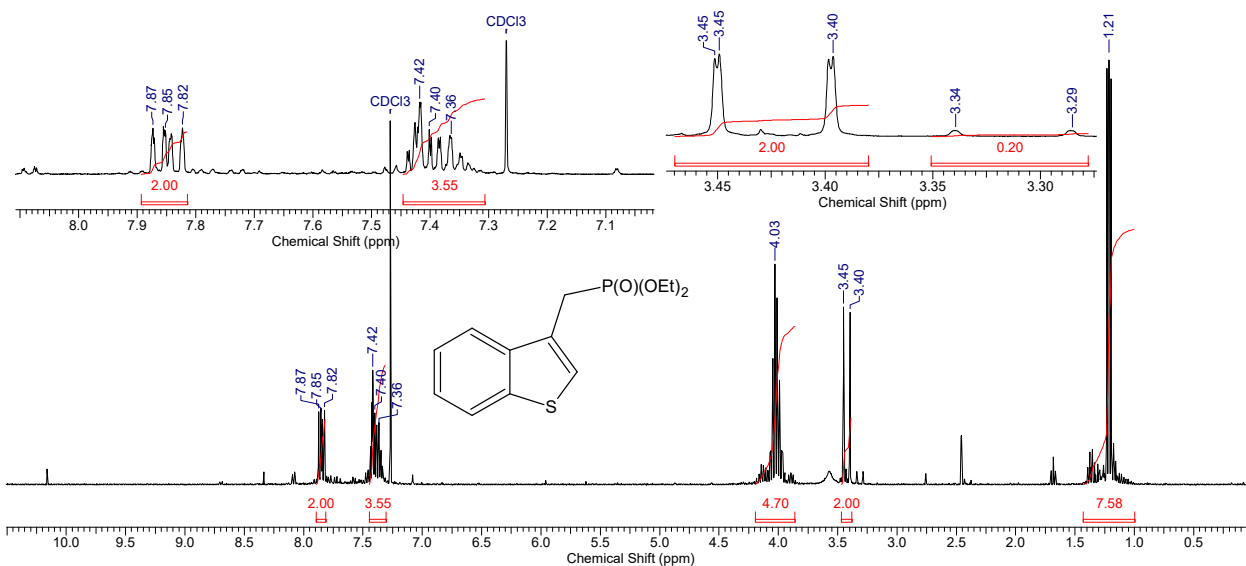

Figure S2. <sup>1</sup>H NMR spectrum (400 MHz, CDCl<sub>3</sub>) of **4**.

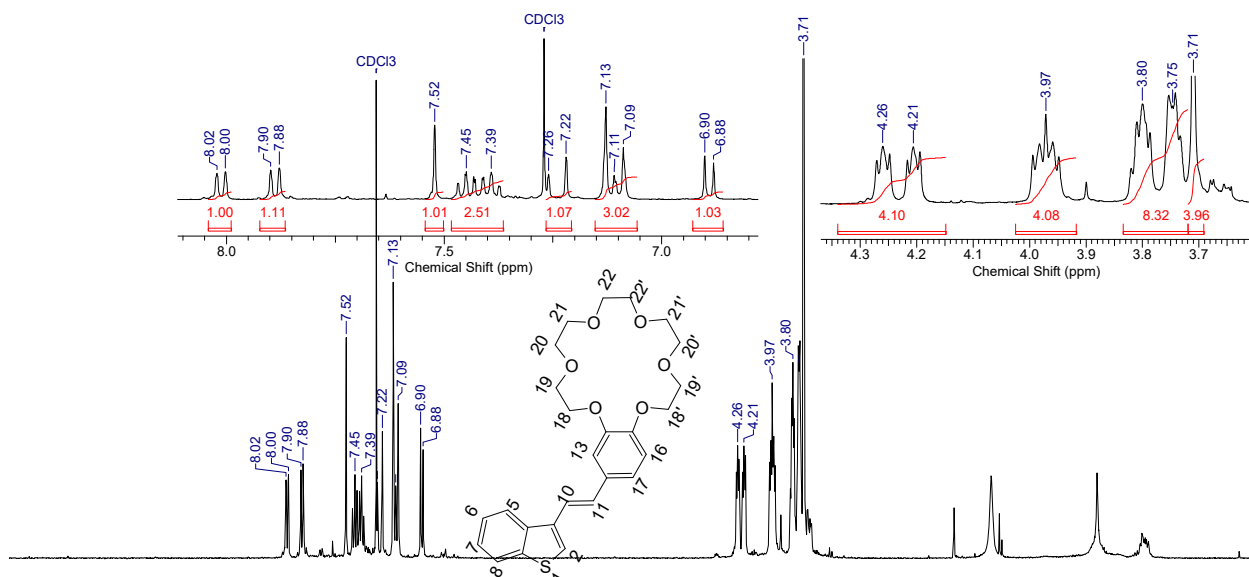

Figure S3. <sup>1</sup>H NMR spectrum (400 MHz, CDCl<sub>3</sub>) of **3**.

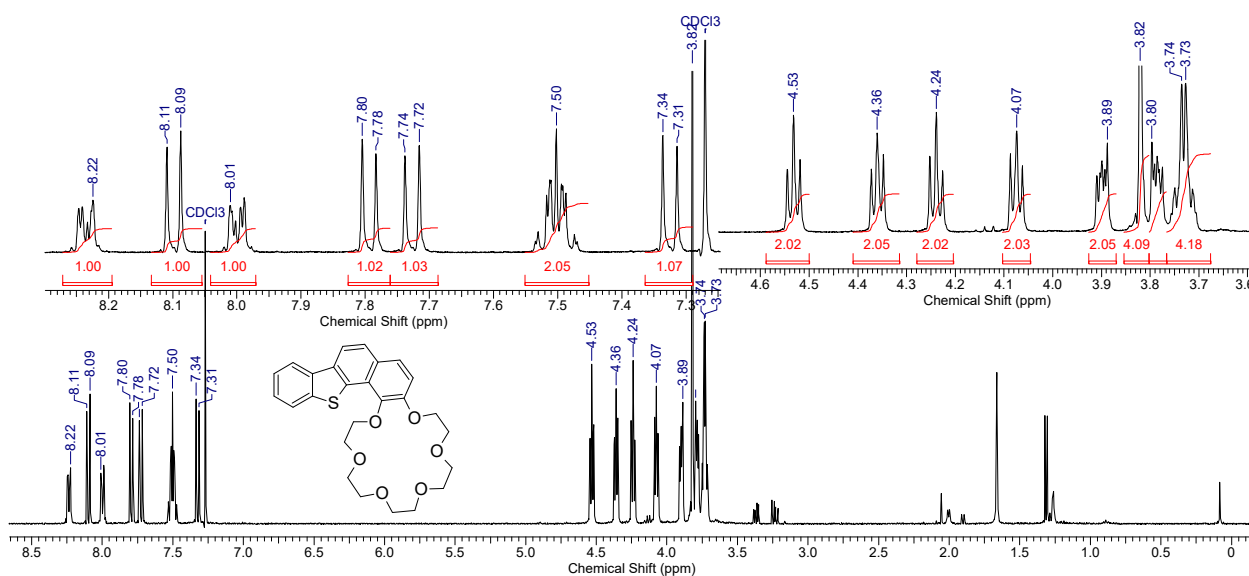

Figure S4. <sup>1</sup>H NMR spectrum (400 MHz, CDCl<sub>3</sub>) of **1**.

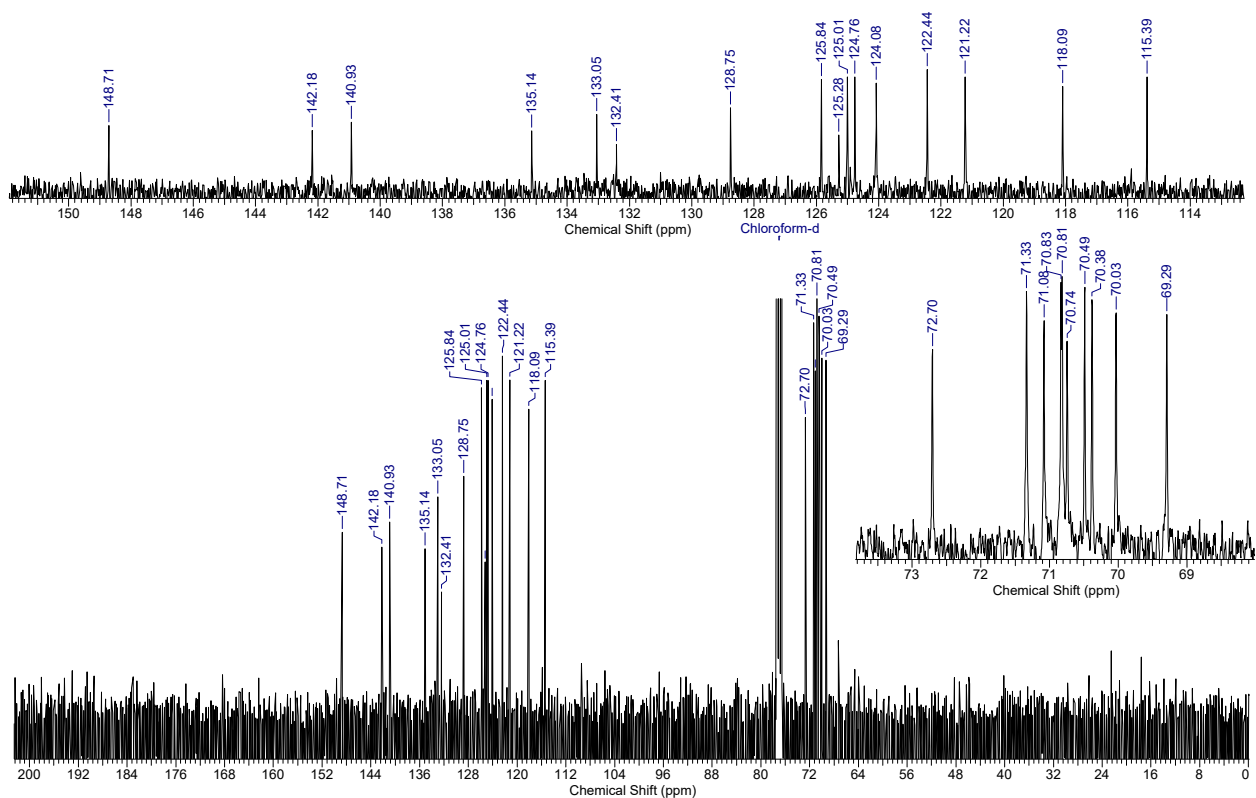

Figure S5. <sup>13</sup>C NMR spectrum (400 MHz, CDCl<sub>3</sub>) of 1.

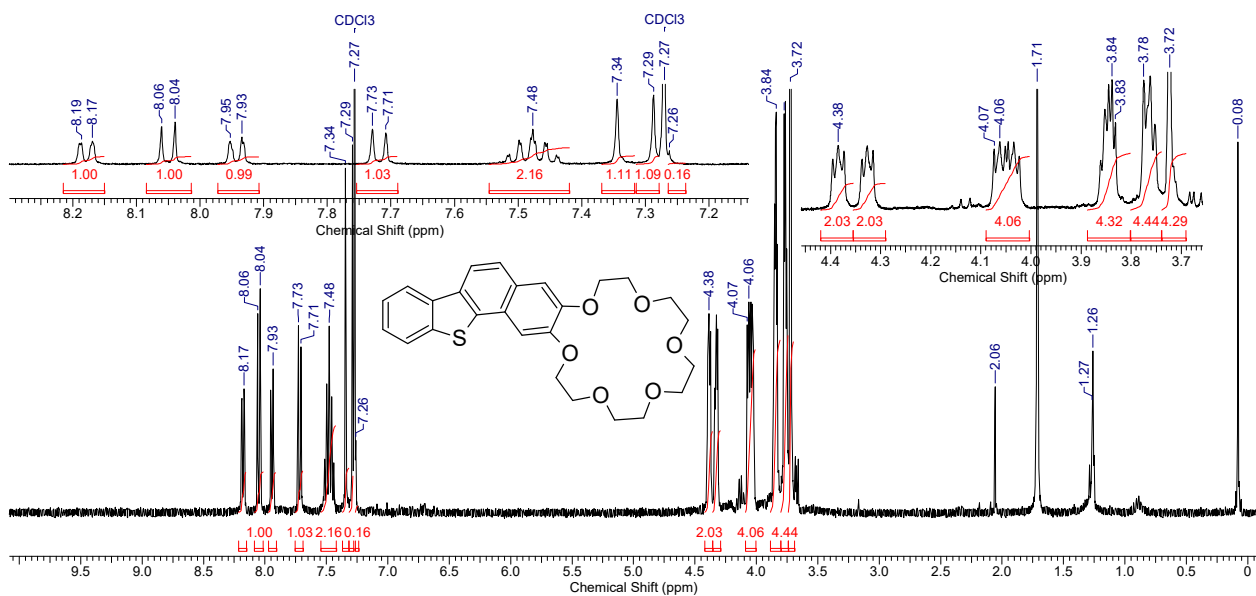

Figure S6. <sup>1</sup>H NMR spectrum (400 MHz, CDCl<sub>3</sub>) of 2.

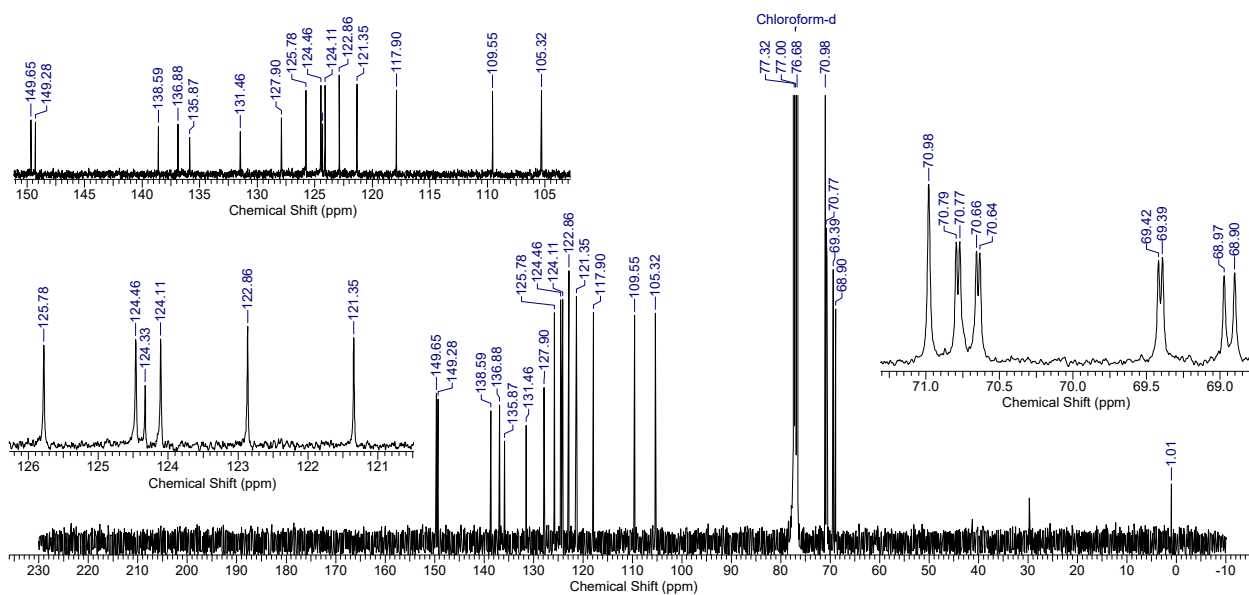

Figure S7.  $^{13}\text{C}$  NMR spectrum (400 MHz,  $\text{CDCl}_3$ ) of **2**.

## 2. 2D spectra

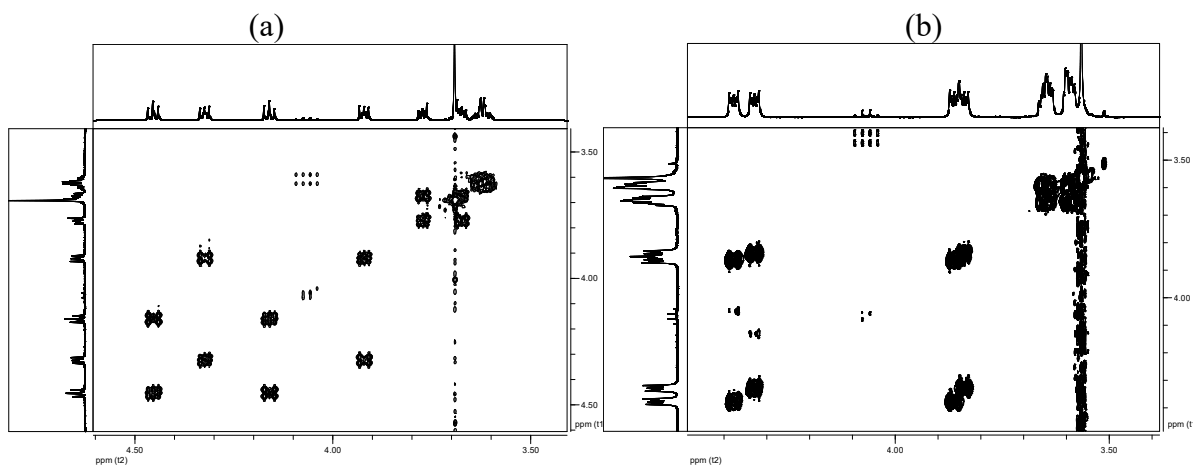

Figure S8 COSY spectra (400 MHz,  $\text{CDCl}_3$ ) of crown ether part of (a) **1** and (b) **2**.

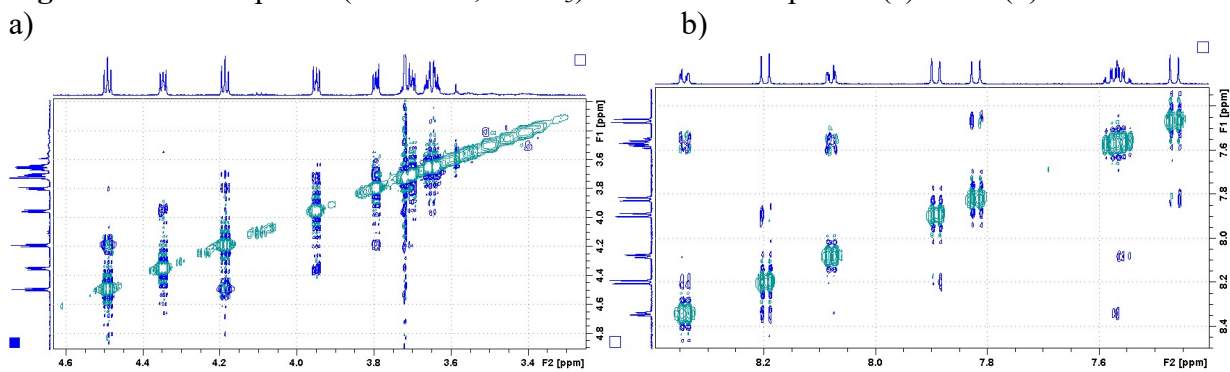

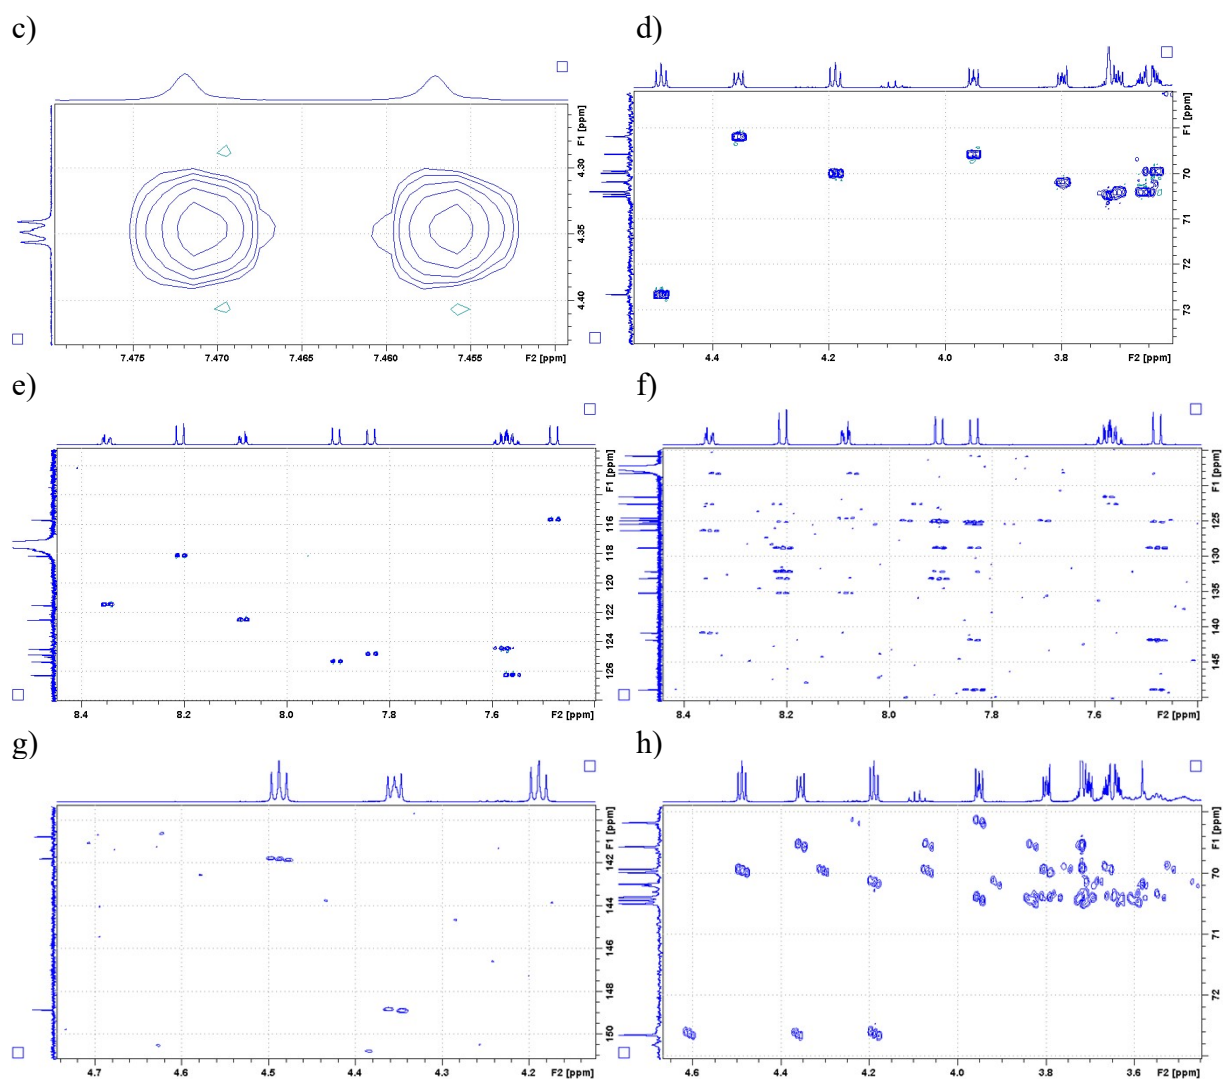

**Figure S9.** NOESY; HMBS, HSQC of **1** (600 MHz, CD<sub>3</sub>CN). a) NOESY of the crown ether part; b) NOESY of the aromatic part; c) NOESY cross-peak between aromatic and crown ether part; d) HSQC of the aromatic part; e) HSQC of the crown ether part; f) HMBC of the aromatic region; g) HMBC cross peaks between crown ether and aromatic part; h) HMBC of the aromatic part.

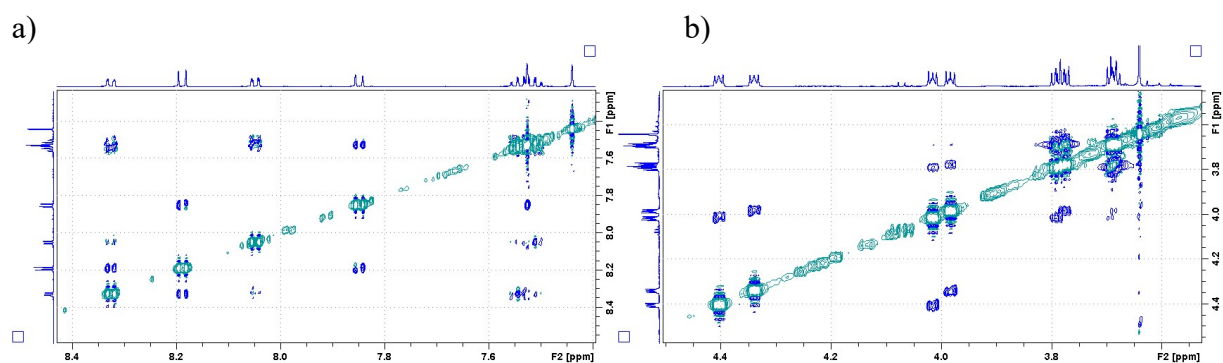

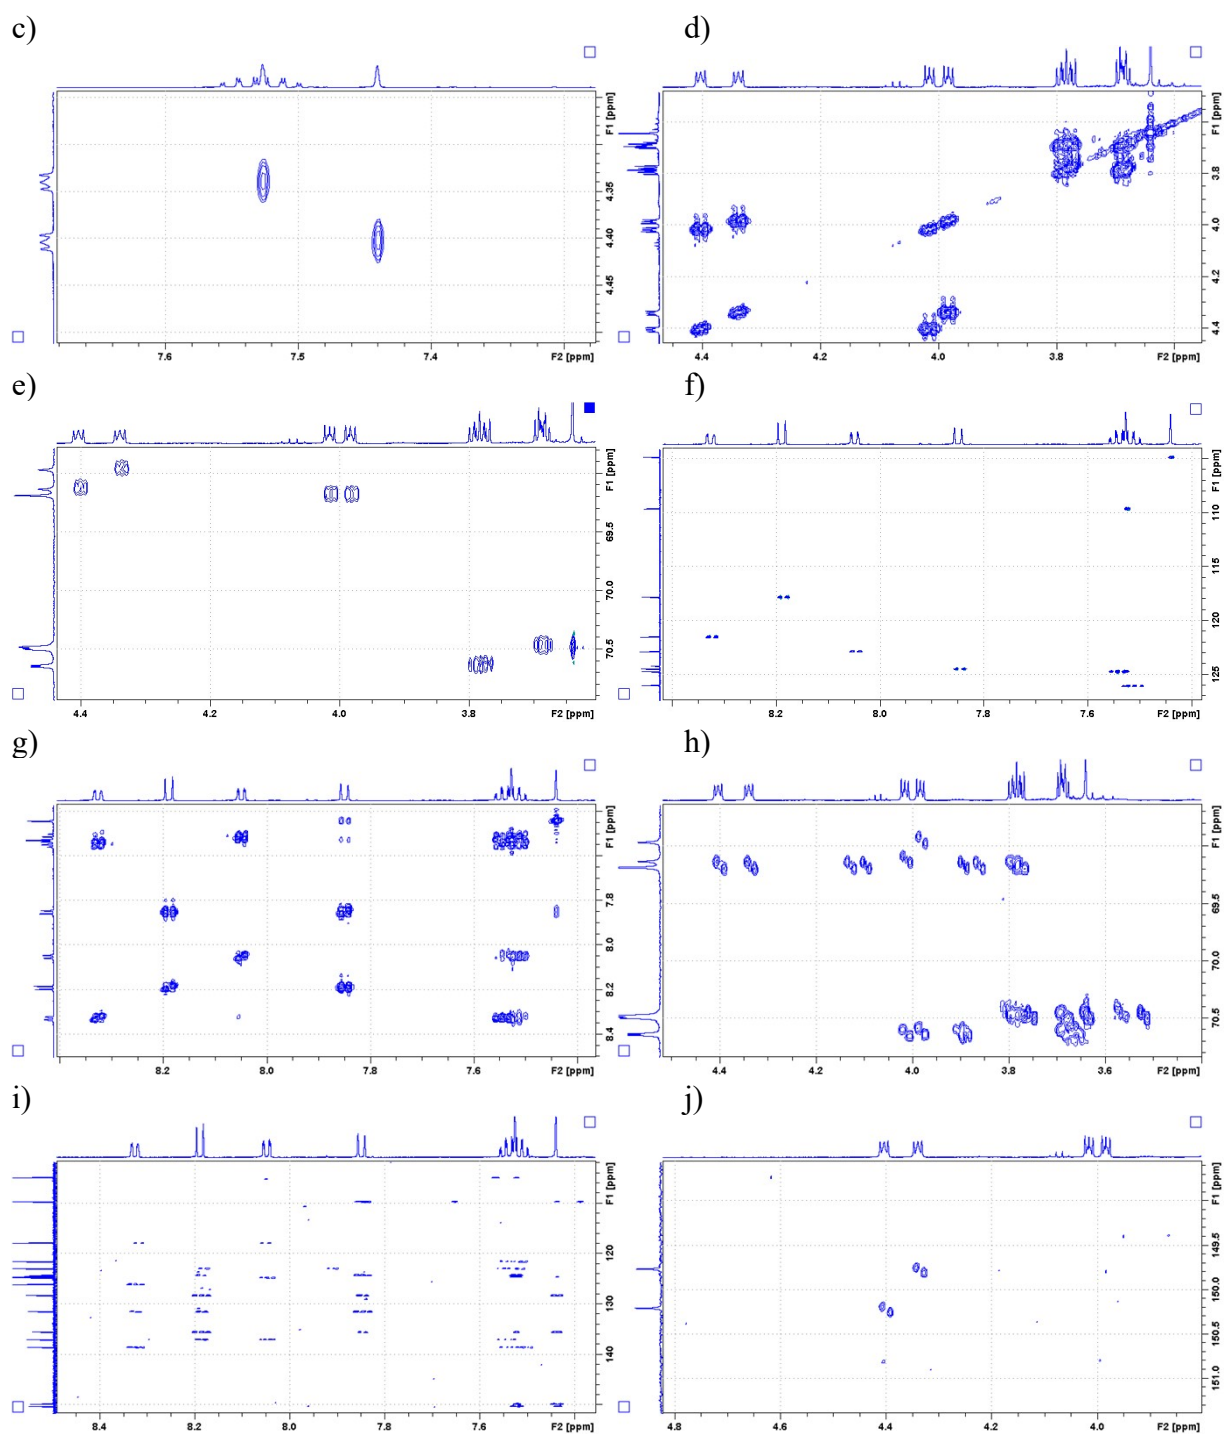

**Figure S10.** NOESY; HMBS, HSQC of **2** (600 MHz, CD<sub>3</sub>CN). a) NOESY of the aromatic part; b) NOESY of the crown ether part; c) NOESY cross-peaks between aromatic and crown ether part; d) COSY of the crown ether part; e) COSY of the aromatic part; f) HSQC of the crown ether region; g) HSQC of aromatic region; h) HMBC of the crown part; i) HMBC of the aromatic region; j) HMBC cross peaks between crown ether and aromatic part.

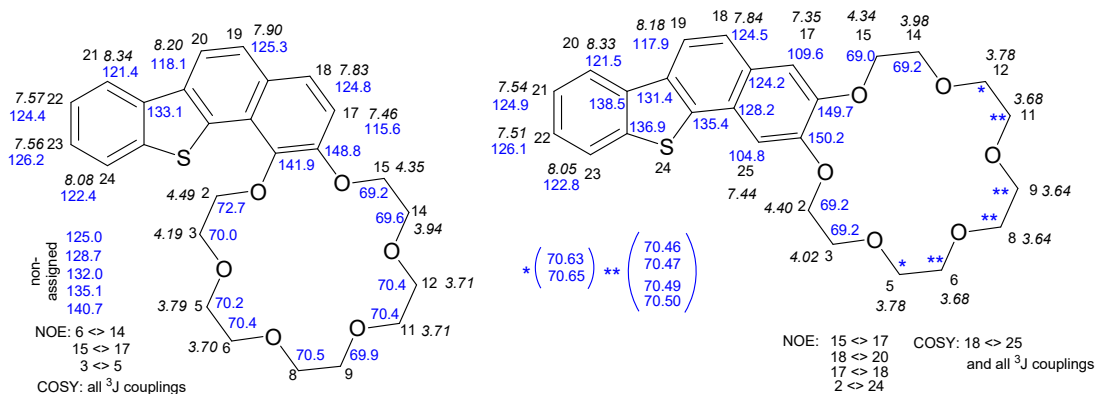

**Figure S11.** NMR assignments (<sup>1</sup>H shown in *italics*, <sup>13</sup>C shown in blue) based on NOESY; HMBS, HSQC of **1** (CD<sub>3</sub>CN) and **2** ((CD<sub>3</sub>)<sub>2</sub>CO) (600 MHz).

### 3.High-resolution mass-spectrometry of **1** and **2**.

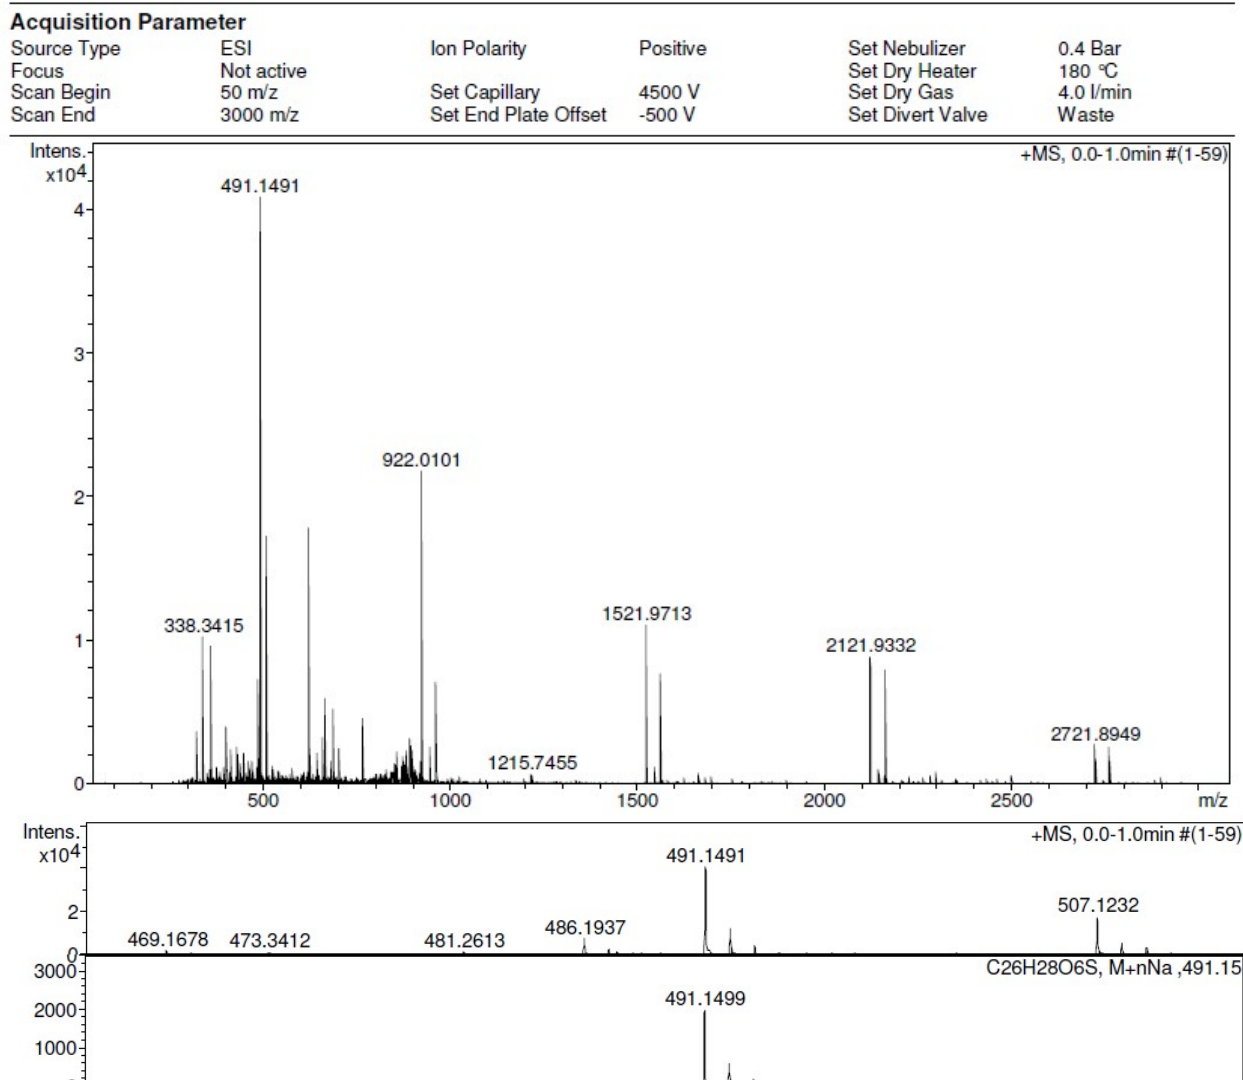

**Figure S12.** HRMS of **1**.

### Acquisition Parameter

|             |            |                      |          |                  |           |
|-------------|------------|----------------------|----------|------------------|-----------|
| Source Type | ESI        | Ion Polarity         | Positive | Set Nebulizer    | 0.4 Bar   |
| Focus       | Not active |                      |          | Set Dry Heater   | 180 °C    |
| Scan Begin  | 50 m/z     | Set Capillary        | 4500 V   | Set Dry Gas      | 4.0 l/min |
| Scan End    | 3000 m/z   | Set End Plate Offset | -500 V   | Set Divert Valve | Waste     |

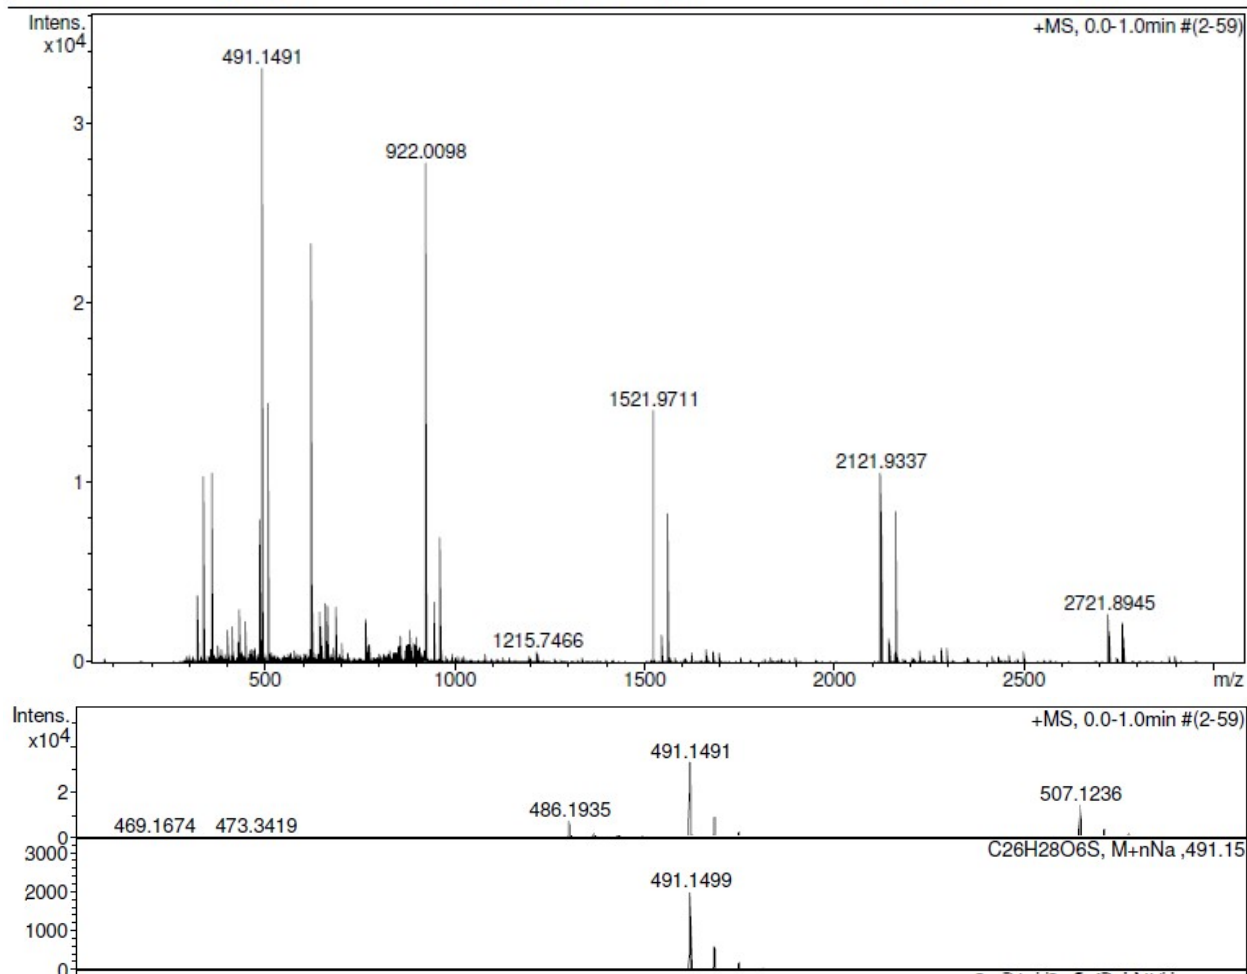

**Figure S13.** HRMS of 2.



## 4. Titrations

### 4.1. NMR titration

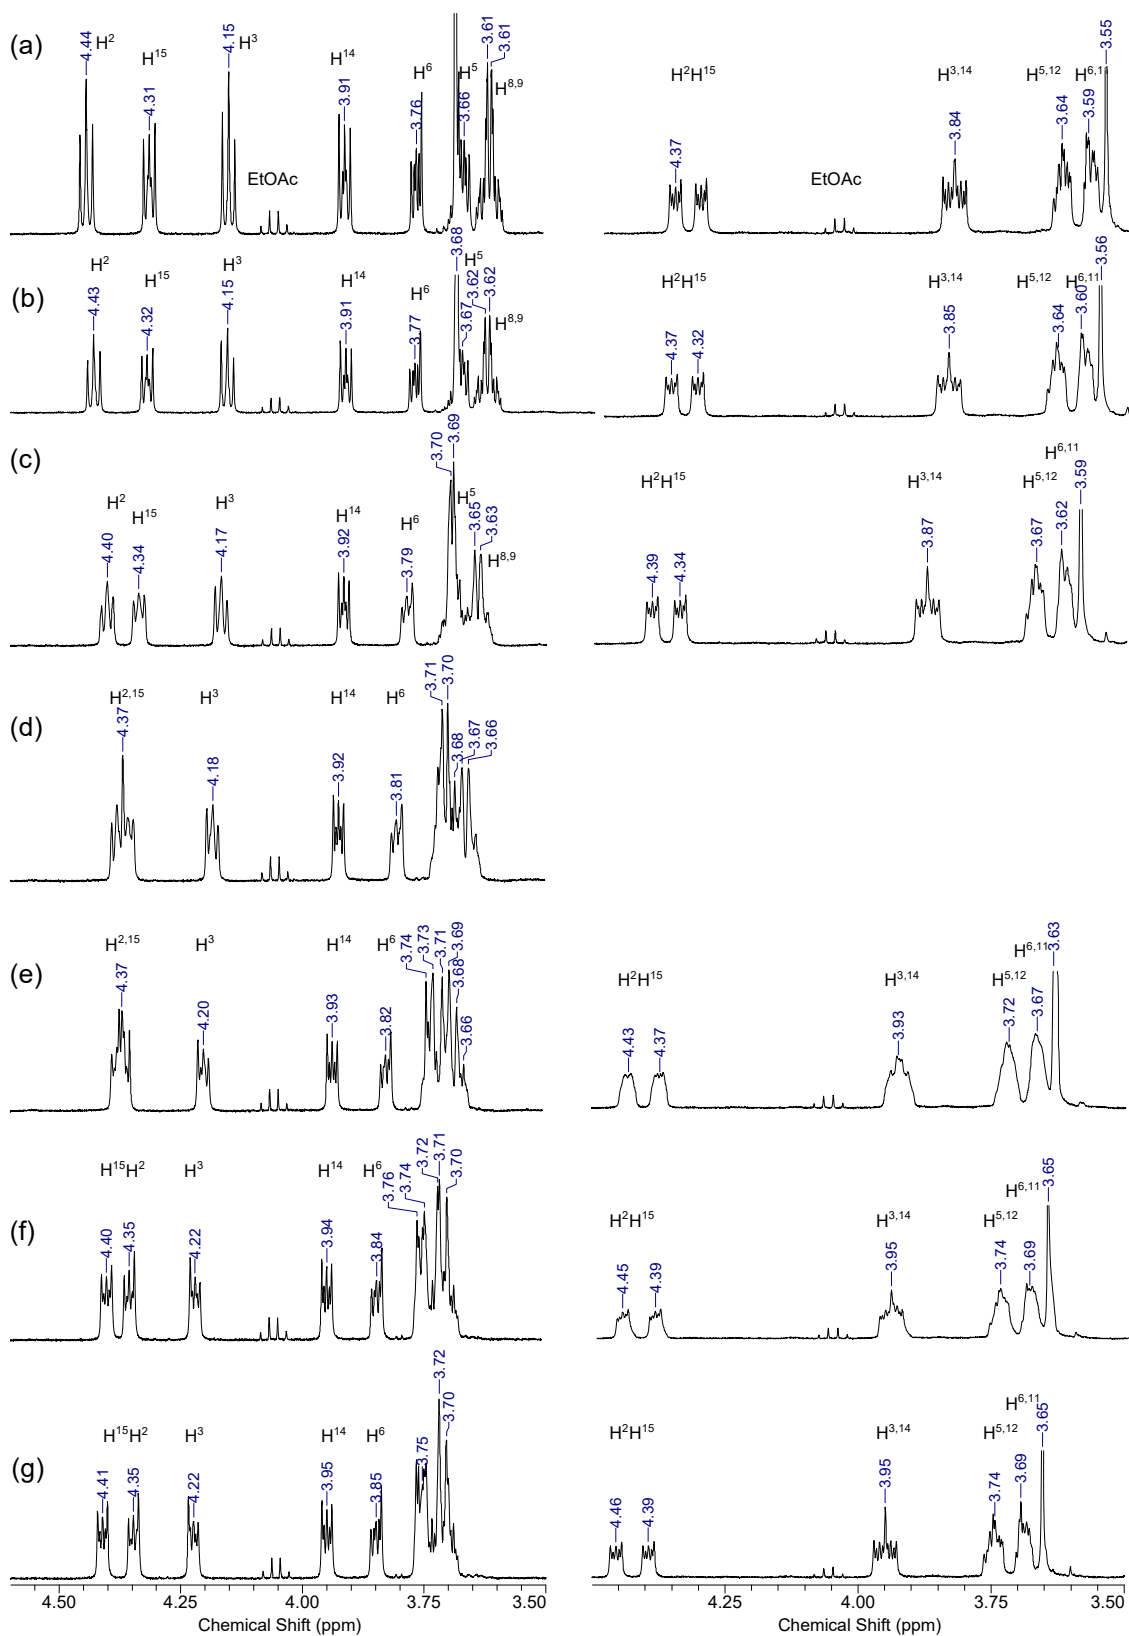

**Figure S14** NMR titration (400 MHz, CD<sub>3</sub>CN) results of **1** (left) and **2** (right) by NH<sub>4</sub>ClO<sub>4</sub> (crown ether part of the spectrum). Salt to crown ether ratio: (a) – 0; (b) – 0.1; (c) – 0.3; (d) – 0.5; (e) – 0.7; (f) – 1; (g) - excess.

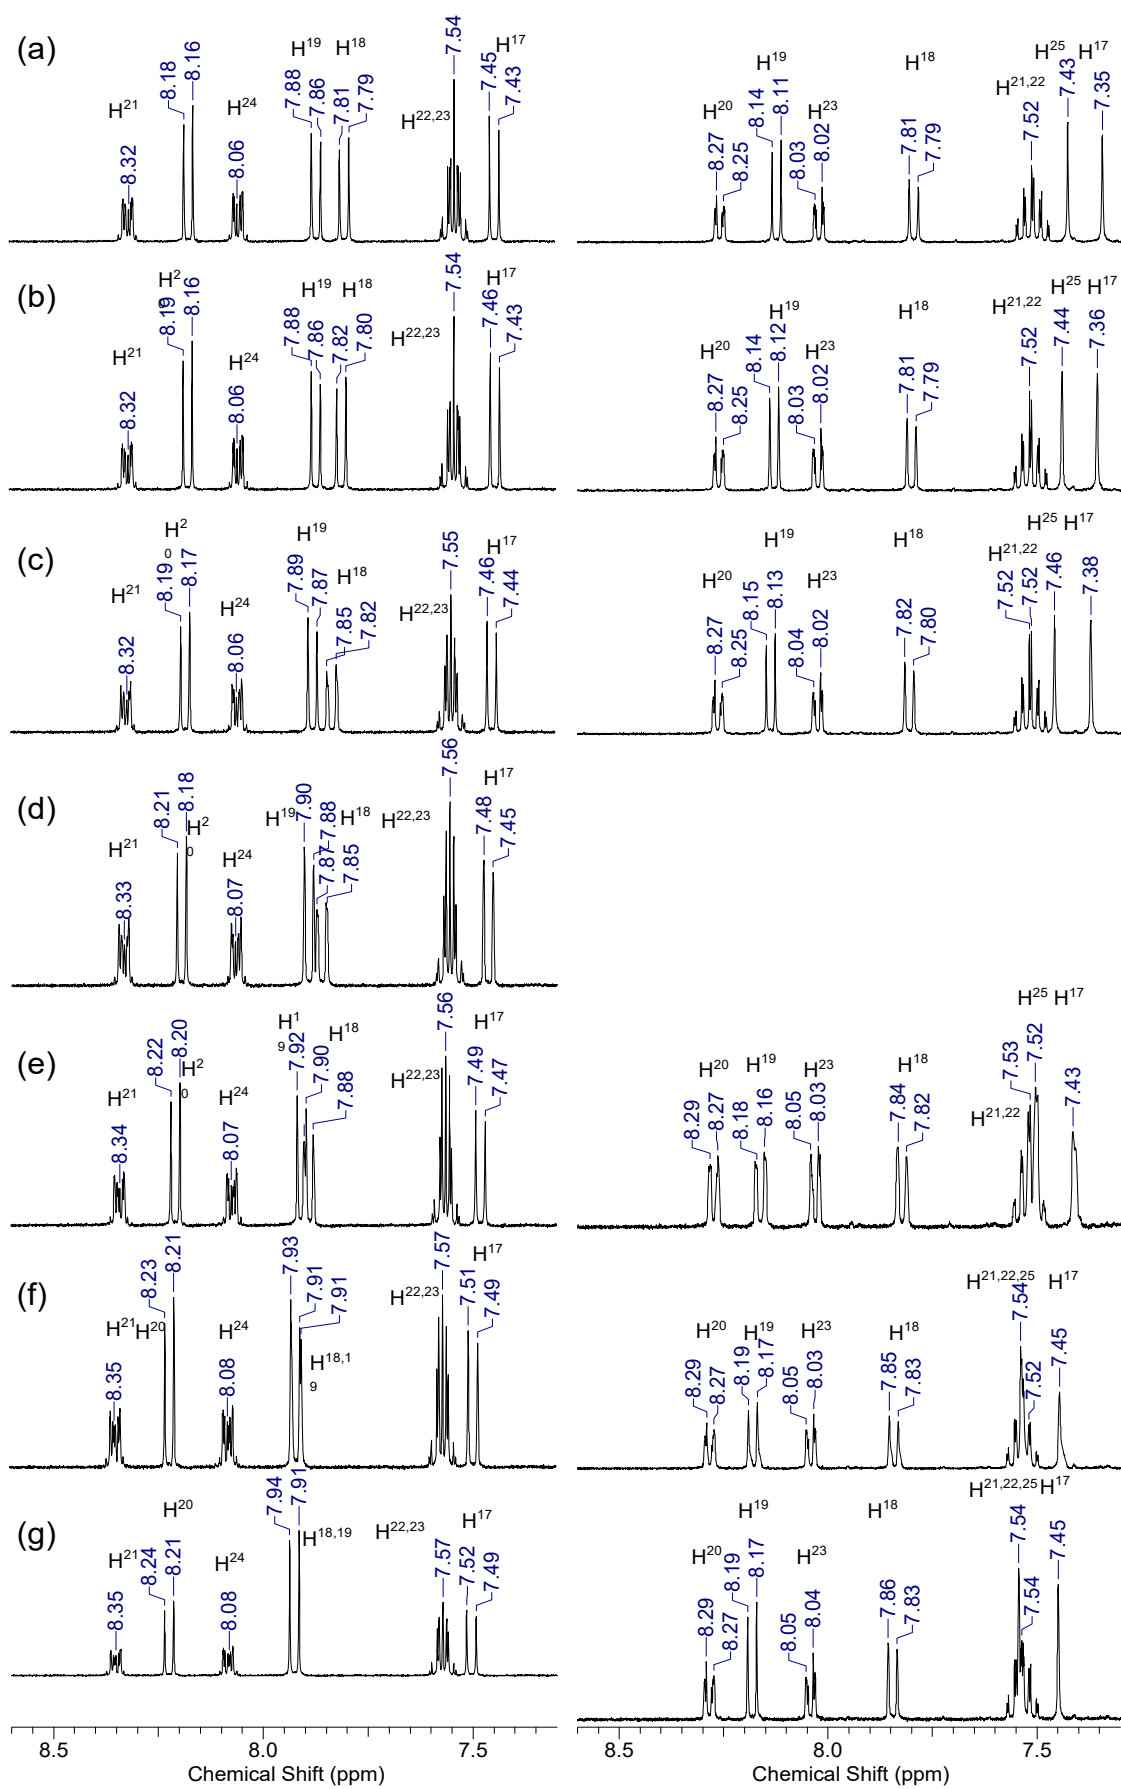

**Figure S15** NMR titration (400 MHz, CD<sub>3</sub>CN) results of **1** (left) and **2** (right) by NH<sub>4</sub>ClO<sub>4</sub> (aromatic part of the spectrum). Salt to crown ether ratio: (a) – 0; (b) – 0.1; (c) – 0.3; (d) – 0.5; (e) – 0.7; (f) – 1; (g) - excess.

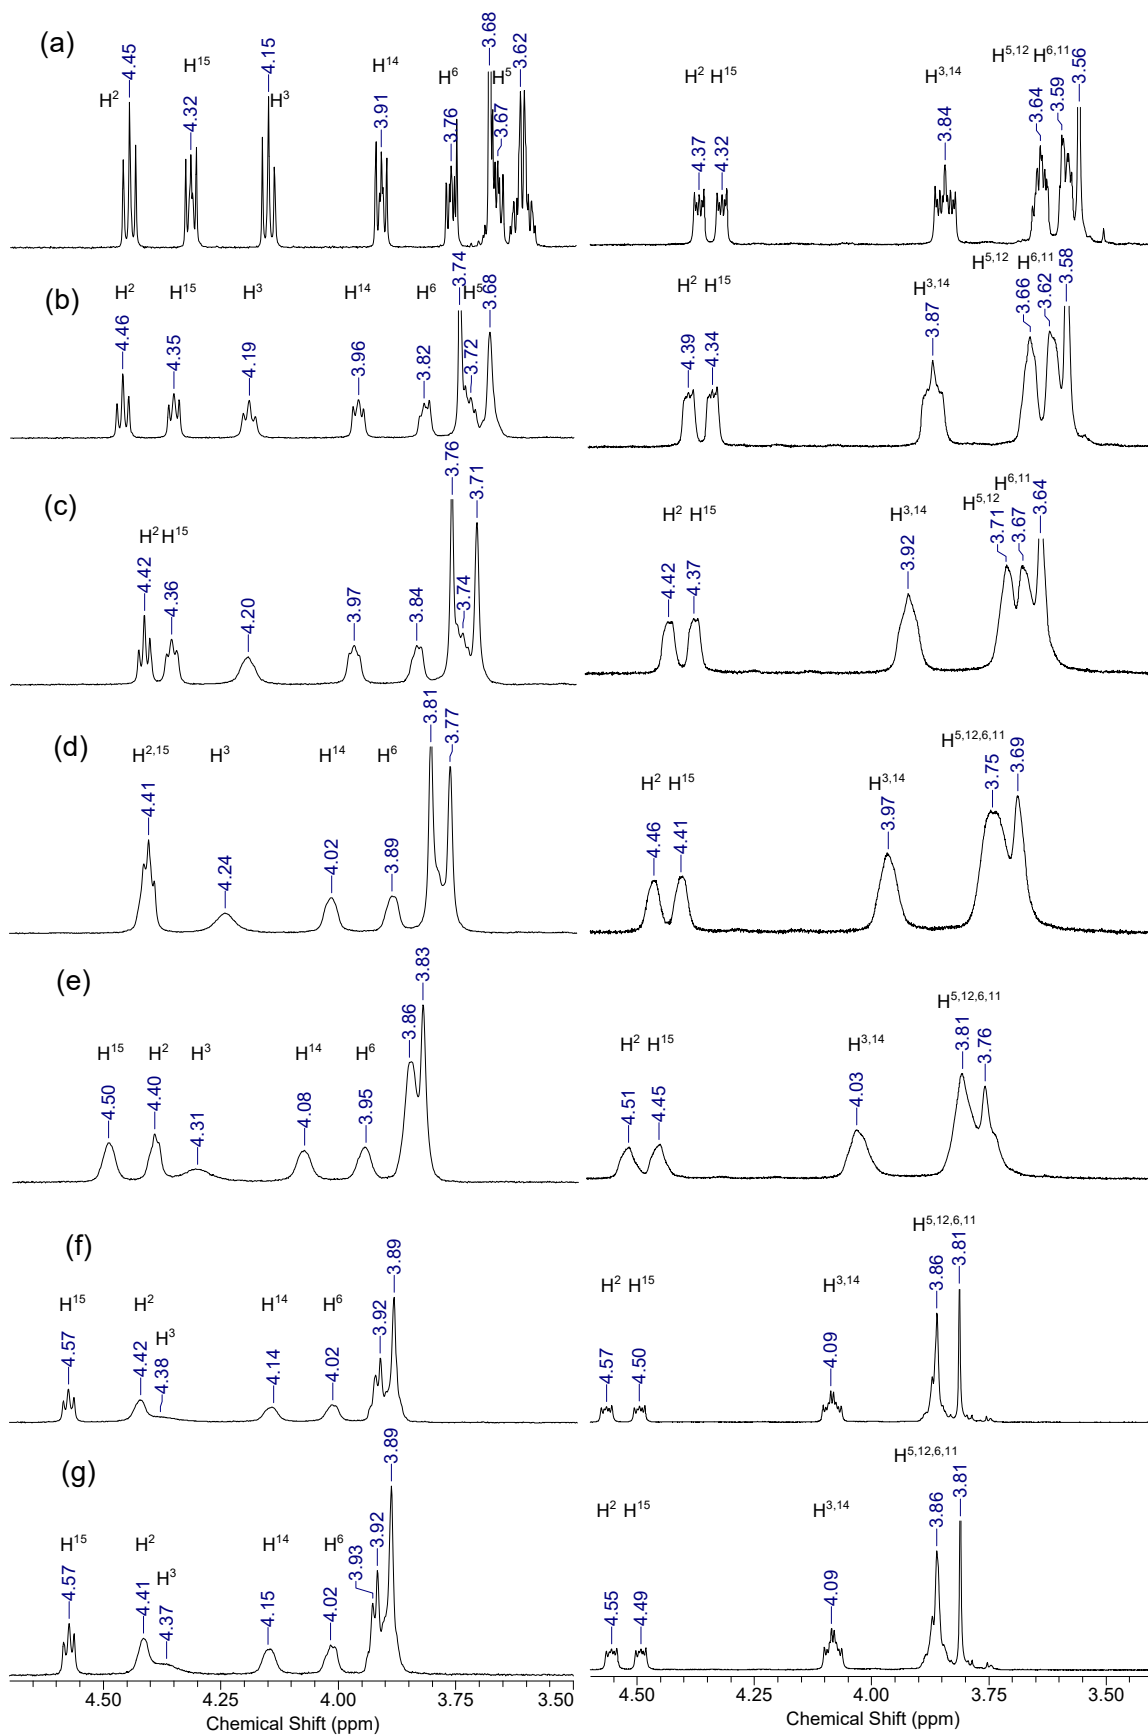

**Figure S16** NMR titration (400 MHz, CD<sub>3</sub>CN) results of **1** (left) and **2** (right) Ba(ClO<sub>4</sub>)<sub>2</sub> (crown ether part). Salt to crown ether ratio: (a) – 0; (b) – 0.1; (c) – 0.3; (d) – 0.5; (e) – 0.7; (f) – 1; (g) – excess.

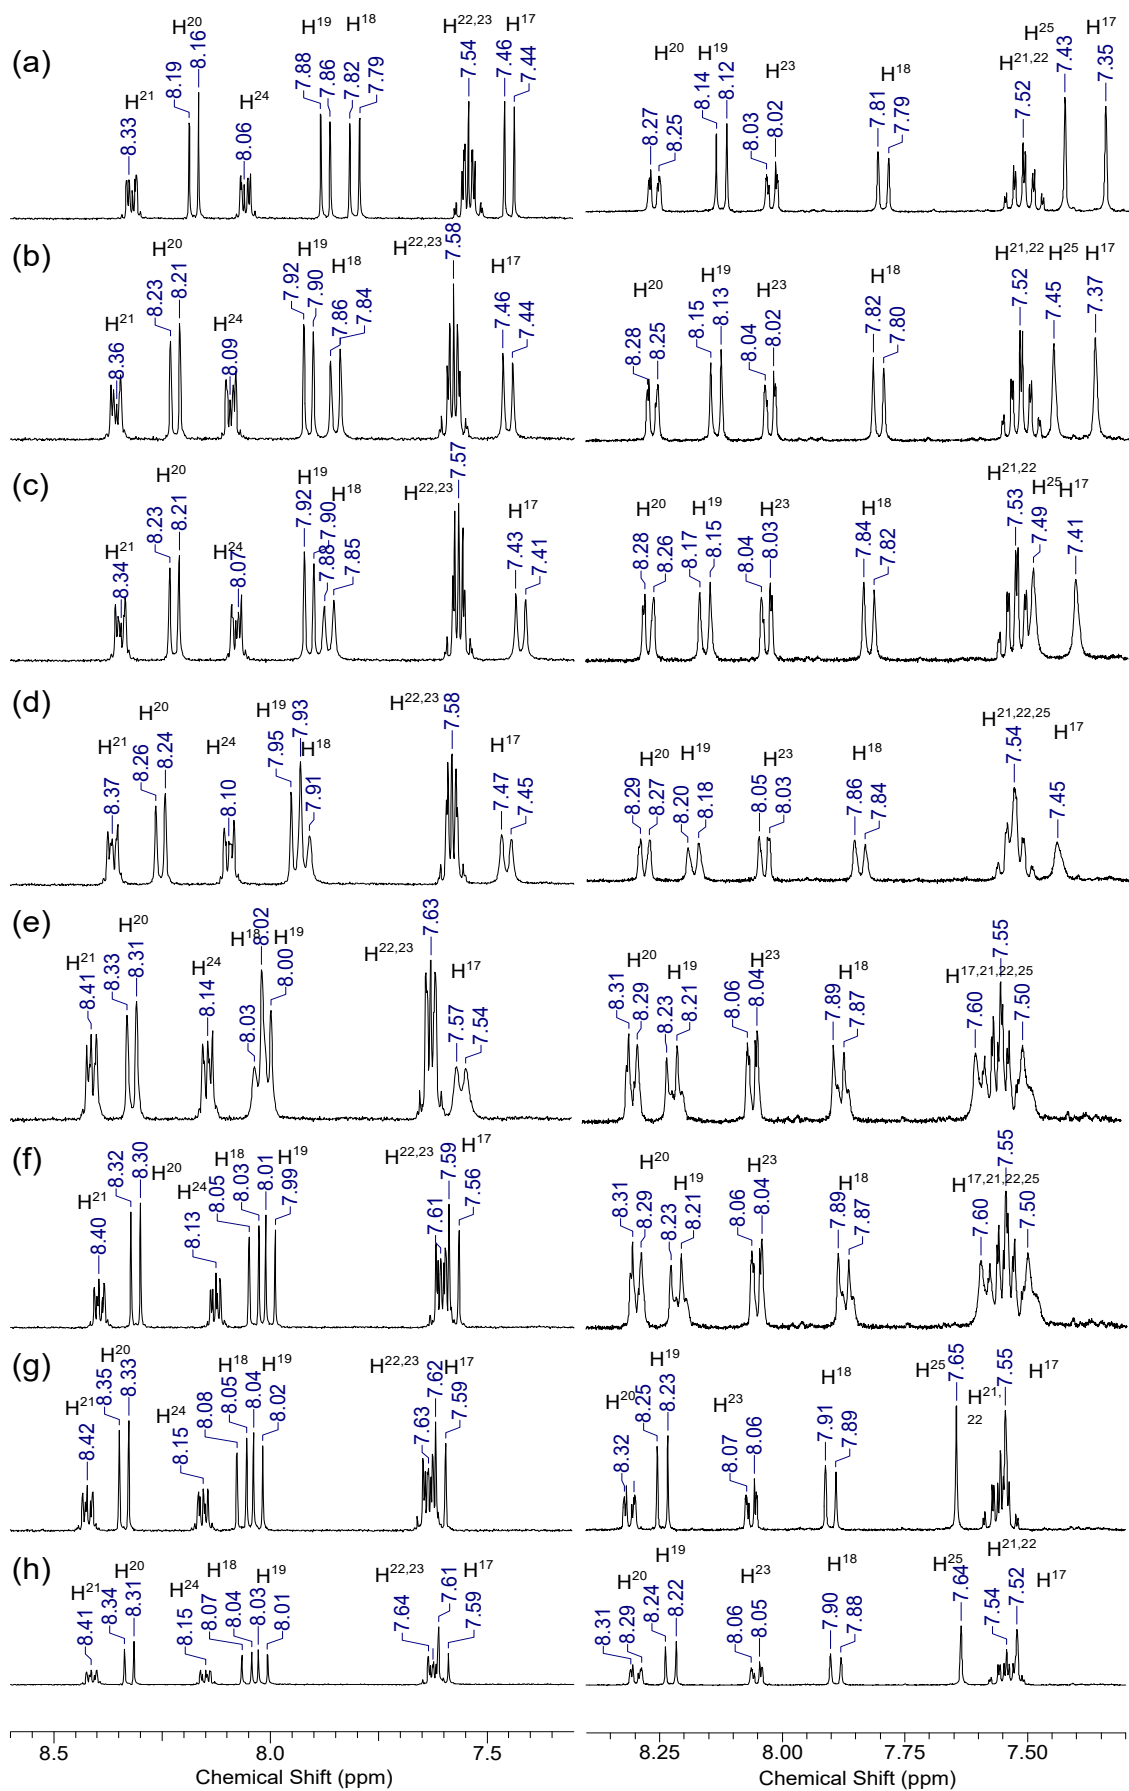

**Figure S17** NMR titration (400 MHz,  $\text{CD}_3\text{CN}$ ) results of **1** (left) and **2** (right)  $\text{Ba}(\text{ClO}_4)_2$  (aromatic part). Salt to crown ether ratio: (a) – 0; (b) – 0.1; (c) – 0.3; (d) – 0.5; (e) – 0.7; (f) – 1; (g) – 1.5; (h) - excess.

## 4.2. UV-Vis and fluorescence titration

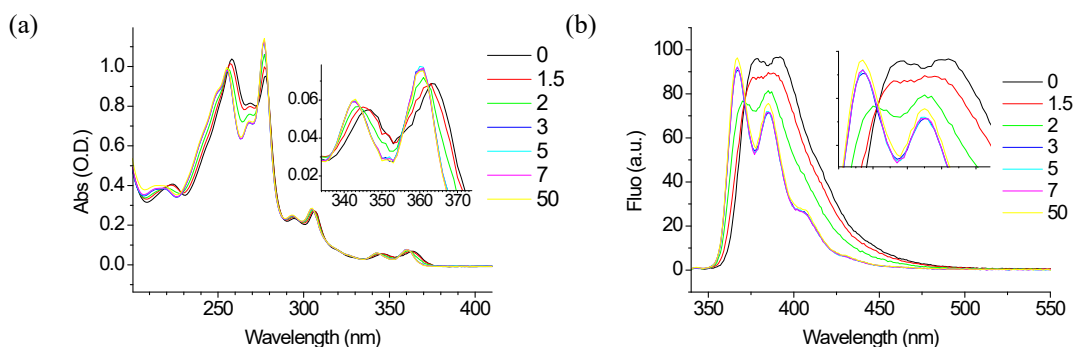

**Figure S18.** Absorbion (a) (CH<sub>3</sub>CN, 2 × 10<sup>-5</sup>M) and fluorescence (b) ((CH<sub>3</sub>CN, 2 × 10<sup>-5</sup>M, λ<sub>ex</sub> = 305 nm) spectra of **1** upon the addition of Ba(ClO<sub>4</sub>)<sub>2</sub>. Added equivalents of the salt is shown in the legend.

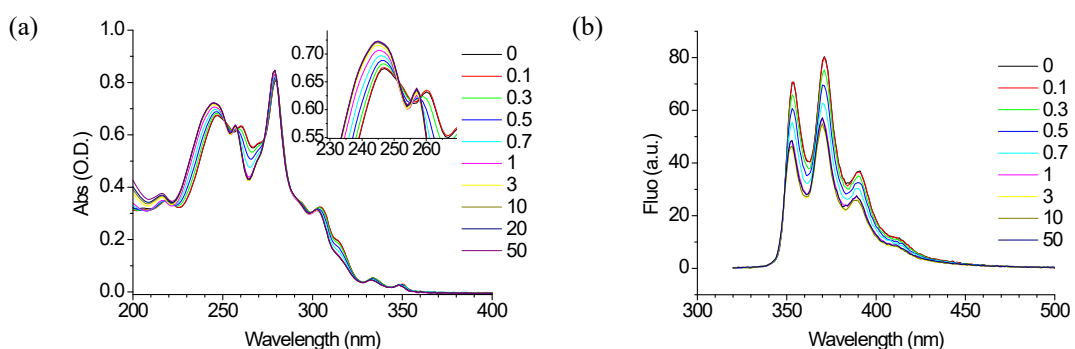

**Figure S19.** Absorbion (a) (CH<sub>3</sub>CN, 2 × 10<sup>-5</sup>M) and fluorescence (b) (CH<sub>3</sub>CN, 2 × 10<sup>-5</sup>M, λ<sub>ex</sub> = 310 nm) spectra of **2** upon the addition of Ba(ClO<sub>4</sub>)<sub>2</sub>. Added equivalents of the salt is shown in the legend.

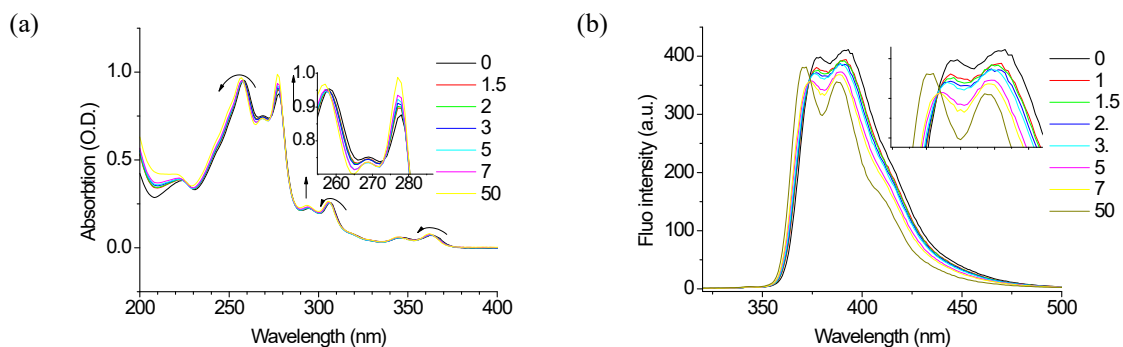

**Figure S20.** Absorbion (a) (CH<sub>3</sub>CN, 2 × 10<sup>-5</sup>M) and fluorescence (b) (CH<sub>3</sub>CN, 2 × 10<sup>-5</sup>M, λ<sub>ex</sub> = 305 nm) spectra of **1** upon the addition of NH<sub>4</sub>ClO<sub>4</sub>. Added equivalents of the salt is shown in the legend.

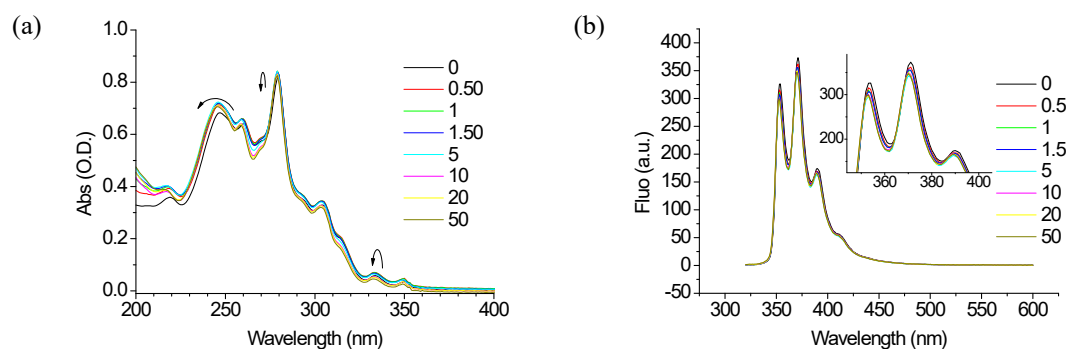

**Figure S21.** Absorption (a) ( $\text{CH}_3\text{CN}$ ,  $2 \times 10^{-5}\text{M}$ ) and fluorescence (b) ( $\text{CH}_3\text{CN}$ ,  $2 \times 10^{-5}\text{M}$ ,  $\lambda_{\text{ex}} = 310 \text{ nm}$ ) spectra of **2** upon the addition of  $\text{NH}_4\text{ClO}_4$ . Added equivalents of the salt is shown in the legend.

## 5. DOSY experiments on native and complexed **CE 1** and **CE 2**.

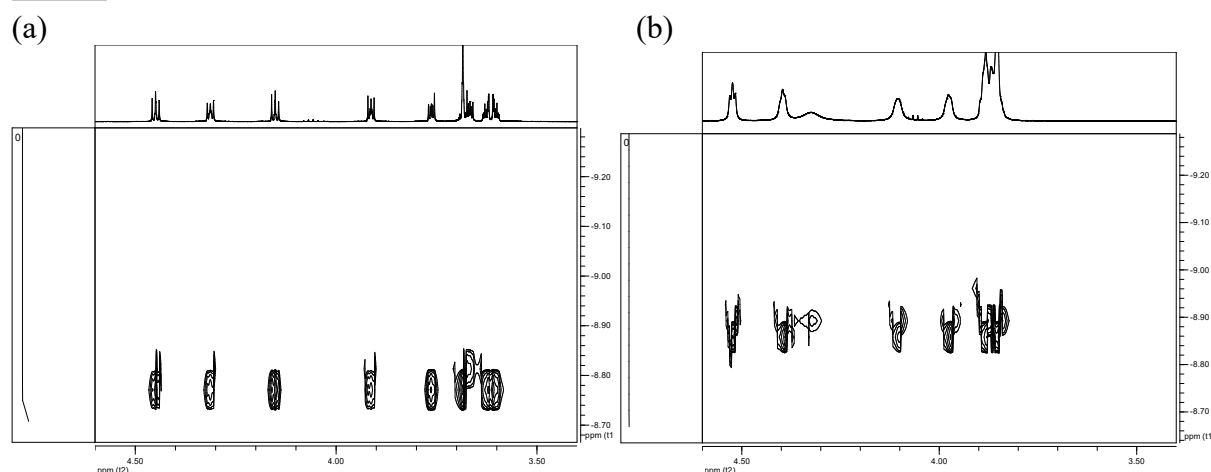

**Figure S22.** 2D DOSY experiments (0.011 M,  $\text{CD}_3\text{CN}$ , crown part is shown) of **CE 1** (a) free ligand; (b) in the presence of  $\text{Ba}(\text{ClO}_4)_2$  (**CE 1** : salt 1:1.2).  $\log D$ : **CE 1**: -8.8(at 3.92 ppm); **CE 2**\* $\text{Ba}^{2+}$  -8.9(at 4.10 ppm)

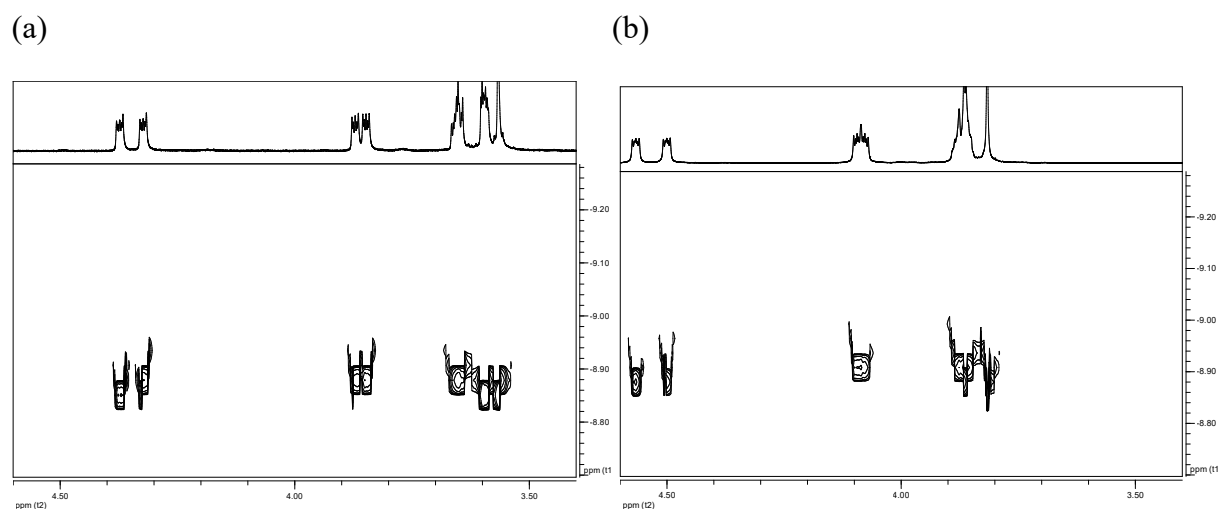

**Figure S23.** 2D DOSY experiments (0.012 M,  $\text{CD}_3\text{CN}$ , crown part is shown) of **CE 2** (a) free ligand; (b) in the presence of  $\text{Ba}(\text{ClO}_4)_2$  (**CE 2** : salt 1:1.2)  $-\log D$ : **CE 2**: -8.9(at 3.84 ppm); **CE 2**\* $\text{Ba}^{2+}$  -8.9(at 4.09 ppm)

## **6. Representative conformations of crown ethers 1 and 2.**

Energies of representative conformations of the isomers CE **1** and CE **2** were calculated using the methodology described in {Sharapa, 2019 #76}.

### **6.1. Generating conformations with dihedral angles close to 0 Deg**

First, optimized geometries from the Supplementary info of {Sharapa, 2019 #76} were taken and fragments OCH<sub>2</sub>CH<sub>2</sub>O with dihedral angles *ca.* +/-60 Deg, unique from the symmetry viewpoint were determined. Then a relaxed potential energy surface scan has been performed for the determined dihedrals driven from the starting angle to 0±5 Deg with 10 Deg increment. It was done to ensure that the part of the resulting conformations the non-influenced by this procedure to be as close to the starting ones as possible.

Also, a new conformation was generated from benzo-18-crown-6, in which a OCH<sub>2</sub>CH<sub>2</sub>O fragment closest to the benzo-ring is placed within the crown ether cavity (No.9).

**Table S1**

|   | Starting conformation                                                              | Conformation with a dihedral driven to <i>ca.</i> 0 Deg (the dihedral that was brought to <i>ca.</i> 0 is marked with the ellipse) |                                                                                     |
|---|------------------------------------------------------------------------------------|------------------------------------------------------------------------------------------------------------------------------------|-------------------------------------------------------------------------------------|
| 1 | 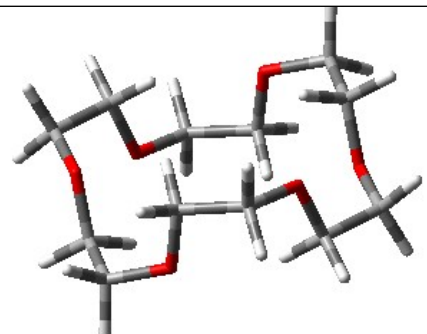  |                                                  |                                                                                     |
| 2 |   |                                                  |  |
| 3 |  |                                                 |                                                                                     |



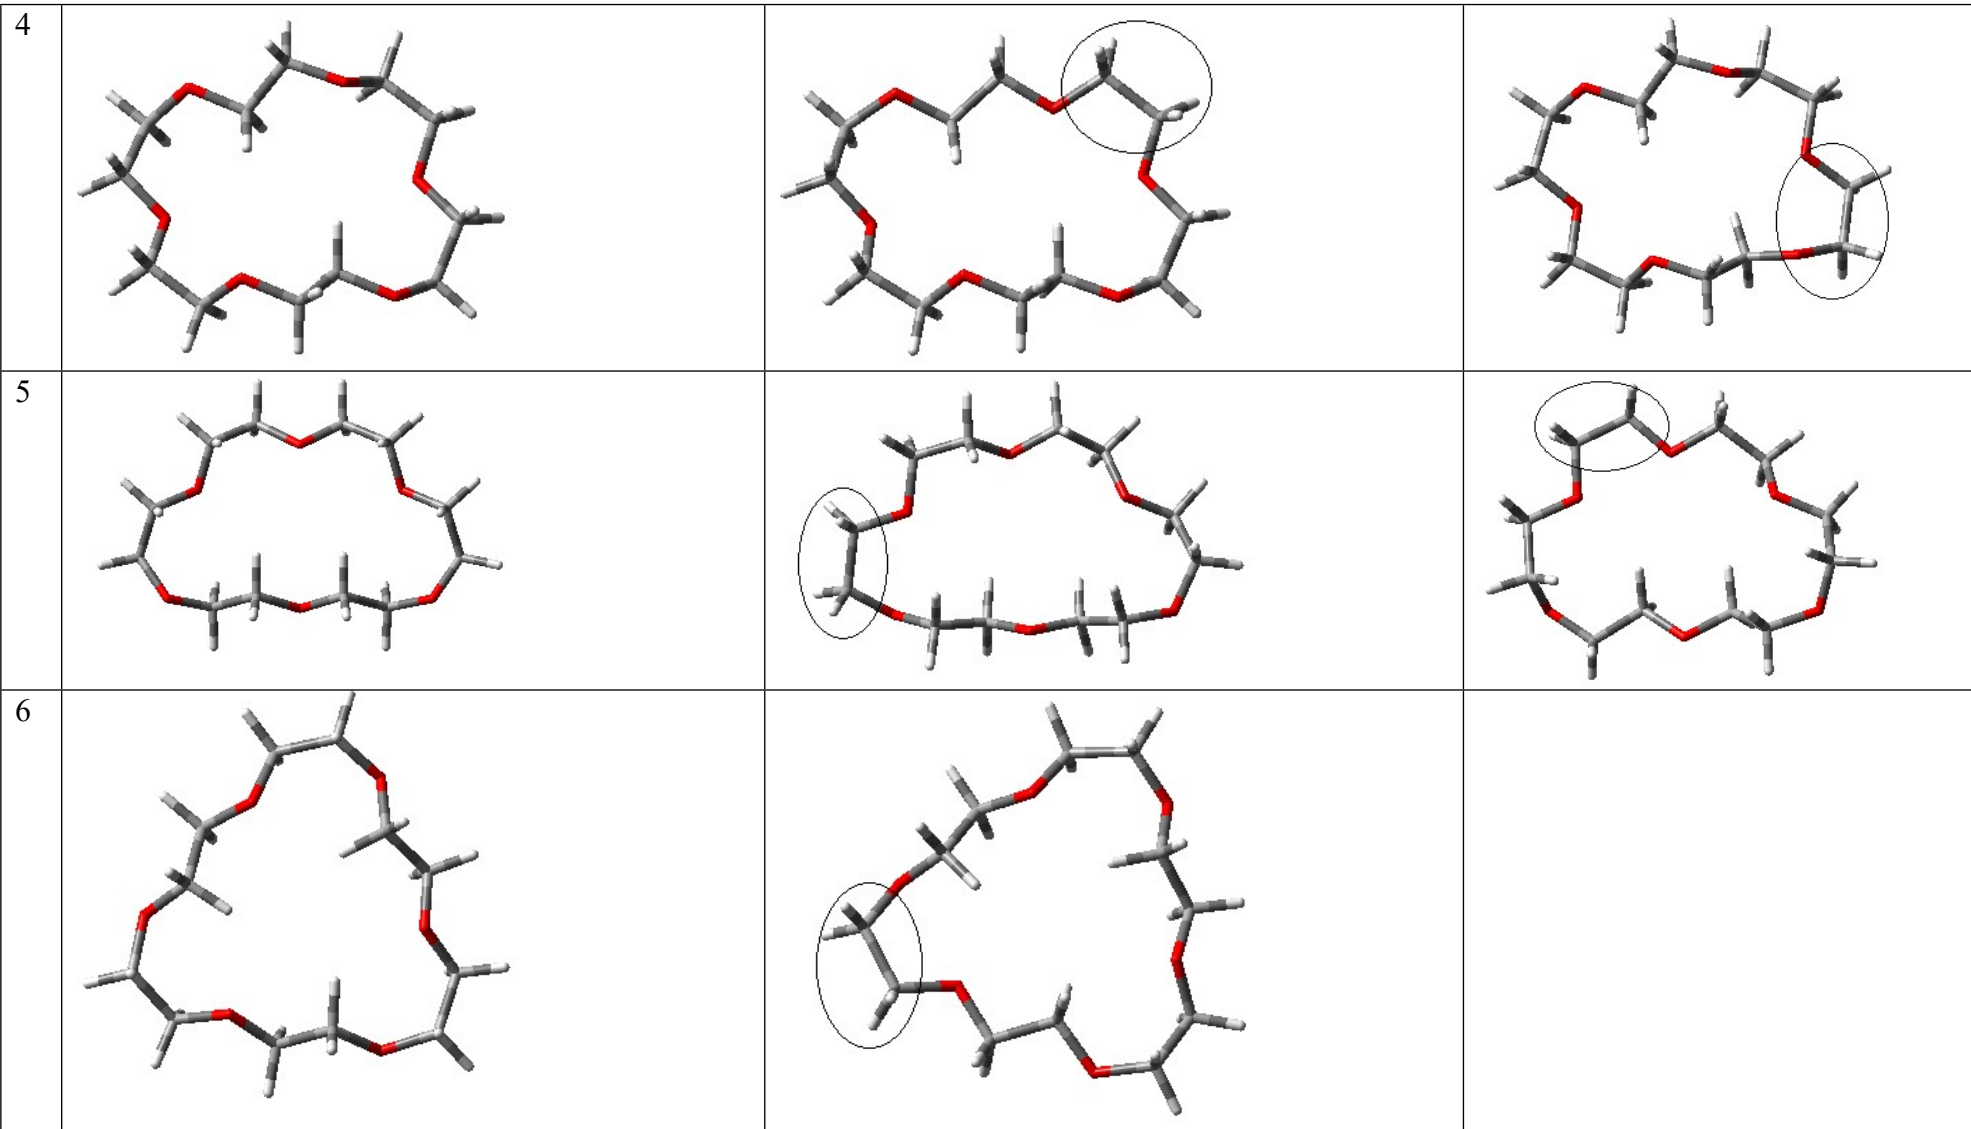

7

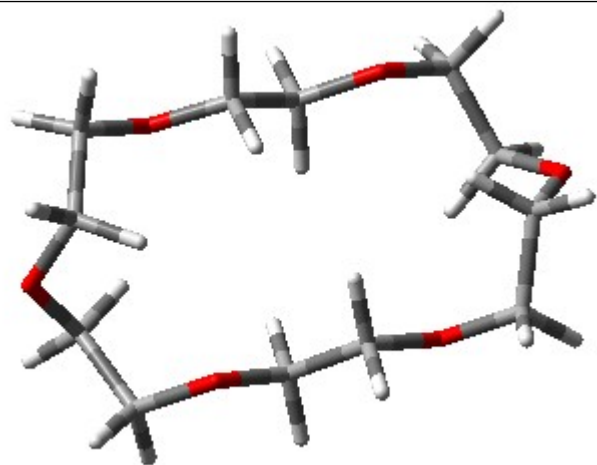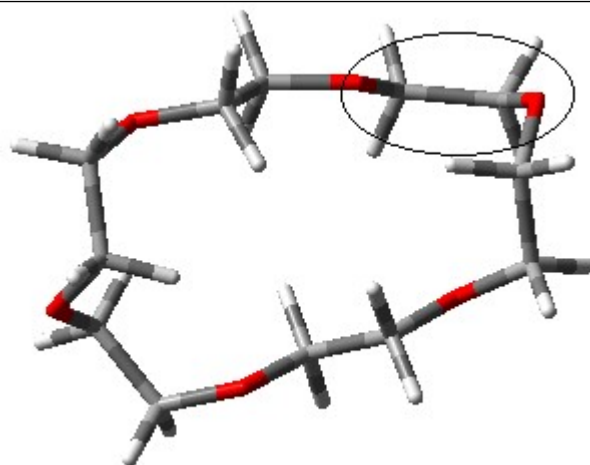

8

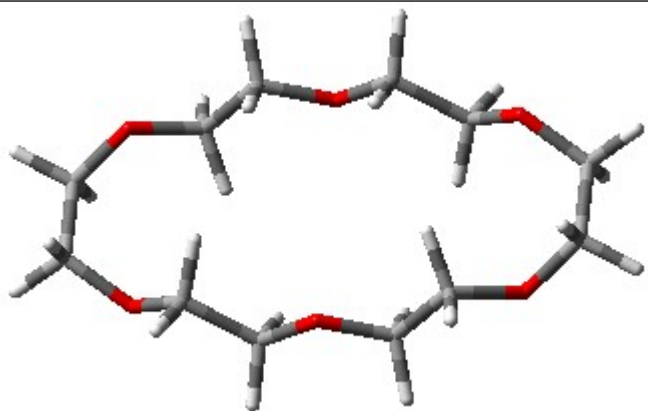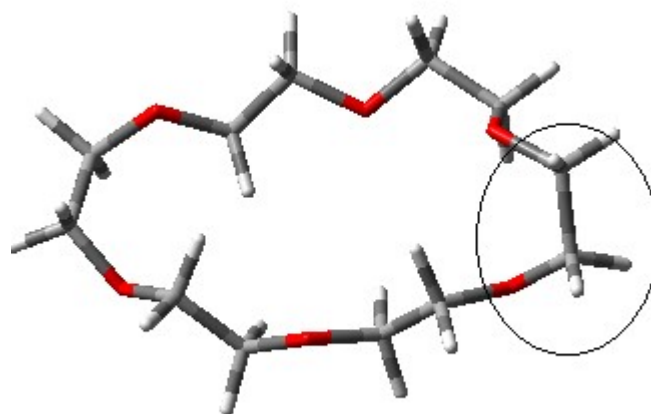

9\*

## 6.2. Docking of the aromatic fragment and MMF94 optimization both in vacuo and in $\text{CH}_3\text{CN}$ ( $\epsilon = 38.8$ )

Obtained conformations of the 18-crown-6 with one dihedral angle close to 0 Deg was docked to different edges of the aromatic fragment to yield either CE 1 or CE 2 structure. Therefore, series of CE 1 and CE 2 conformations have been obtained, which were optimized by MM4 as realized in Chem 3D package. As the result, geometries of 12 conformations for each isomer was obtained, then, single point job at 6-31+g(d) level of theory was done to obtain the conformations' energies.

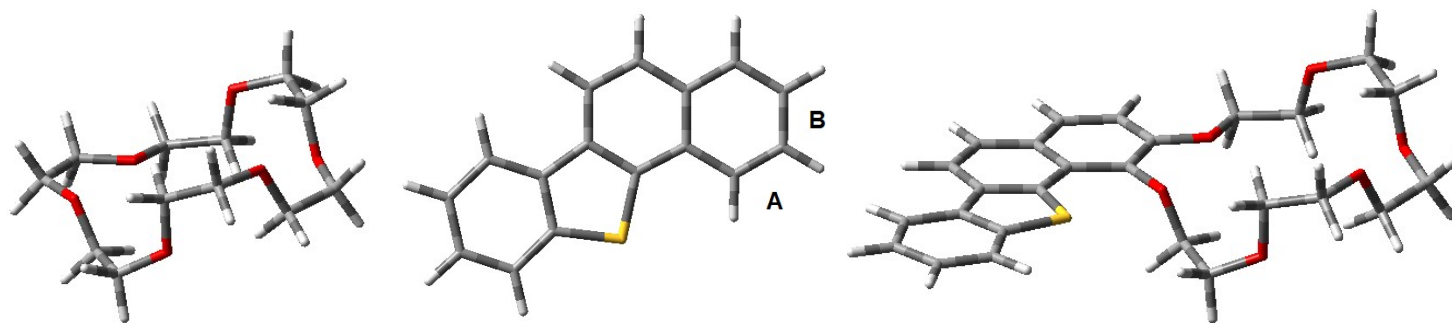

**Figure S24.** Example of docking of the dihedral-driven conformation 1 to the tetracyclic aromatic fragment to get the conformation of the CE 1.

### 6.3. Single point energy and NMR chemical shifts calculations

Table S2. Crown ether conformations of CE 1 and CE 2 optimized by MMF94 force field.

|               |                                                                                                                                   |               |                                                                                      |
|---------------|-----------------------------------------------------------------------------------------------------------------------------------|---------------|--------------------------------------------------------------------------------------|
| CE 1<br>-c1   | 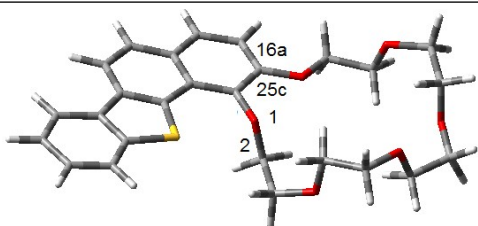 <p><math>D_{16a-25c-1-2} = -77.406</math></p>   | CE 2<br>-c1   |    |
| CE 1<br>-c2-1 |  <p><math>D_{16a-25c-1-2} = -100.097</math></p>  | CE 2<br>-c2-1 |    |
| CE 1<br>-c2-2 |  <p><math>D_{16a-25c-1-2} = -74.951</math></p>  | CE 2<br>-c2-2 |   |
| CE 1<br>-c3   |  <p><math>D_{16a-25c-1-2} = -85.705</math></p> | CE 2<br>-c3   |  |
| CE 1<br>-c4-1 |  <p><math>D_{16a-25c-1-2} = -94.402</math></p> | CE 2<br>-c4-1 |  |

|                            |                                                                                                                                  |                            |                                                                                      |
|----------------------------|----------------------------------------------------------------------------------------------------------------------------------|----------------------------|--------------------------------------------------------------------------------------|
| <p>CE 1<br/>-c4-<br/>2</p> | 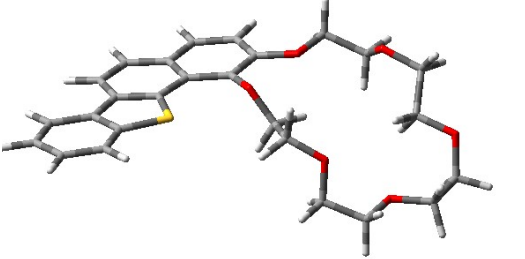 <p><math>D_{16a-25c-1-2} = -72.899</math></p>  | <p>CE 2<br/>-c4-<br/>2</p> |    |
| <p>CE 1<br/>-c5-<br/>1</p> |  <p><math>D_{16a-25c-1-2} = -71.395</math></p>  | <p>CE 2<br/>-c5-<br/>1</p> |    |
| <p>CE 1<br/>-c5-<br/>2</p> |  <p><math>D_{16a-25c-1-2} = 83.977</math></p>  | <p>CE 2<br/>-c5-<br/>2</p> |   |
| <p>CE 1<br/>-c6</p>        |  <p><math>D_{16a-25c-1-2} = 74.675</math></p> | <p>CE 2<br/>-c6</p>        |  |
| <p>CE 1<br/>-c7</p>        |  <p><math>D_{16a-25c-1-2} = 62.611</math></p> | <p>CE 2<br/>-c7</p>        |  |
| <p>CE 1<br/>-c8</p>        |  <p><math>D_{16a-25c-1-2} = 81.024</math></p> | <p>CE 2<br/>-c8</p>        |  |

CE 1  
-c9

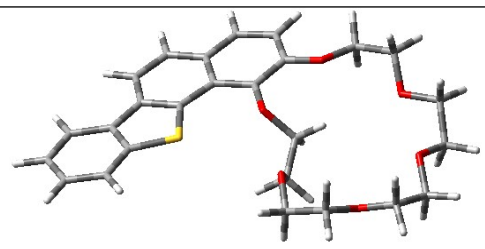

D<sub>16a-25c-1-2</sub> =54.961

CE 2  
-c9

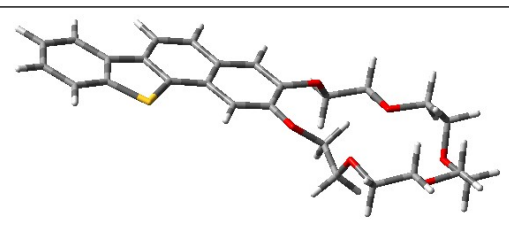

**Table S3** Energies of MMG94 optimized structures and their respective single point energies for sets of CE 1 and CE 2 conformations

| CE 1     |                                                                     |                                                               |                                          |                                                          |                                                   | CE 2      |                                                                     |                                                               |                                           |
|----------|---------------------------------------------------------------------|---------------------------------------------------------------|------------------------------------------|----------------------------------------------------------|---------------------------------------------------|-----------|---------------------------------------------------------------------|---------------------------------------------------------------|-------------------------------------------|
|          | MMF94 energy after optimization (medium $\epsilon=38.8$ ), kcal/mol | Single point energy at 6-31+g(d), PCM (acetonitrile), Hartree | Relative SP energy, kcal/mol from col. 3 | Calculated percent contents at 273K obtained from col. 4 | $C^{16a}-C^{25c}-O^1-C^2$ dihedral angle, Degrees |           | MMF94 energy after optimization (medium $\epsilon=38.8$ ), kcal/mol | Single point energy at 6-31+g(d), PCM (acetonitrile), Hartree | Relative SP energy, kcal/mol, from col. 9 |
| 1        | 2                                                                   | 3                                                             | 4                                        | 5                                                        | 6                                                 | 7         | 8                                                                   | 9                                                             | 10                                        |
| CE 1-c1  | 117.219                                                             | -1857.164865480                                               | 2.24                                     | 1.20%                                                    | -77.406                                           | CE 2-c1   | 113.879                                                             | -1857.169739760                                               | 6.10                                      |
| CE 1-c21 | 116.67                                                              | -1857.160432220                                               | 5.02                                     | 0.01%                                                    | -100.097                                          | CE 2-c21  | 111.006                                                             | -1857.173981560                                               | 3.44                                      |
| CE 1-c22 | 116.743                                                             | -1857.165271180                                               | 1.98                                     | 1.86%                                                    | -74.951                                           | CE 2-c22  | 113.235                                                             | -1857.170460100                                               | 5.65                                      |
| CE 1-c3  | 112.625                                                             | -1857.168135690                                               | 0.19                                     | 40.74%                                                   | -85.705                                           | CE 2-c3   | 107.673                                                             | -1857.179456900                                               | 0.00                                      |
| CE 1-c41 | 119.136                                                             | -1857.156639180                                               | 7.40                                     | 0.00%                                                    | -94.402                                           | CE 2-c4-1 | 110.49                                                              | -1857.174125170                                               | 3.35                                      |
| CE 1-c42 | 118.495                                                             | -1857.161645600                                               | 4.26                                     | 0.04%                                                    | -72.899                                           | CE 2-c4-2 | 114.919                                                             | -1857.166938780                                               | 7.86                                      |
| CE 1-c51 | 119.221                                                             | -1857.161676080                                               | 4.24                                     | 0.04%                                                    | -71.395                                           | CE 2-c5-1 | 115.516                                                             | -1857.165911920                                               | 8.50                                      |
| CE 1-c52 | 118.917                                                             | -1857.158585170                                               | 6.18                                     | 0.00%                                                    | -83.977                                           | CE 2-c5-2 | 116.647                                                             | -1857.166099450                                               | 8.38                                      |
| CE 1-c6  | 118.295                                                             | -1857.162092030                                               | 3.98                                     | 0.06%                                                    | -74.675                                           | CE 2-c6   | 115.178                                                             | -1857.166234770                                               | 8.30                                      |
| CE 1-c7  | 121.548                                                             | -1857.156939880                                               | 7.21                                     | 0.00%                                                    | -62.611                                           | CE 2-c7   | 117.669                                                             | -1857.161376980                                               | 11.35                                     |
| CE 1-c8  | 120.034                                                             | -1857.156030620                                               | 7.78                                     | 0.00%                                                    | -81.024                                           | CE 2-c8   | 117.795                                                             | -1857.157485030                                               | 13.79                                     |
| CE 1-c9  | 113.243                                                             | -1857.168431710                                               | 0.00                                     | 56.05%                                                   | -54.961                                           | CE 2-c9   | 112.684                                                             | -1857.168431710                                               | 6.92                                      |
|          |                                                                     |                                                               |                                          |                                                          | Mean angle -67.93                                 |           |                                                                     |                                                               |                                           |

## 7. Facilitated ion transfer measurements

Voltametric measurements were conducted by means of the amperometric ion-selective electrode (AISE), fig. S25. Plasticized membrane in a form of a conductive organic gel served as sensing element of the AISE. Organic membrane consisted of PVC (8 wt.%), *o*-NPOE as a plasticizer, 20 mM TCIPhBTDA as an electrolyte of an organic phase, and crown-ethers **1** and **2** in various concentrations. To prepare the organic gel these components were mixed in a weighing flask at a temperature of 100-110 °C, then the mixture was left with stirring for 4-5 hours to full swelling of PVC. Heated to the molten state gel was applied to the front-end part of the electrode using dispenser, being left for 6 hours until completely solidified. To polarize the organic membrane and specify the potential, two electrodes are immersed into it: graphitic fiber, modified with ferrocene, as a reference electrode, and counter platinum electrode.

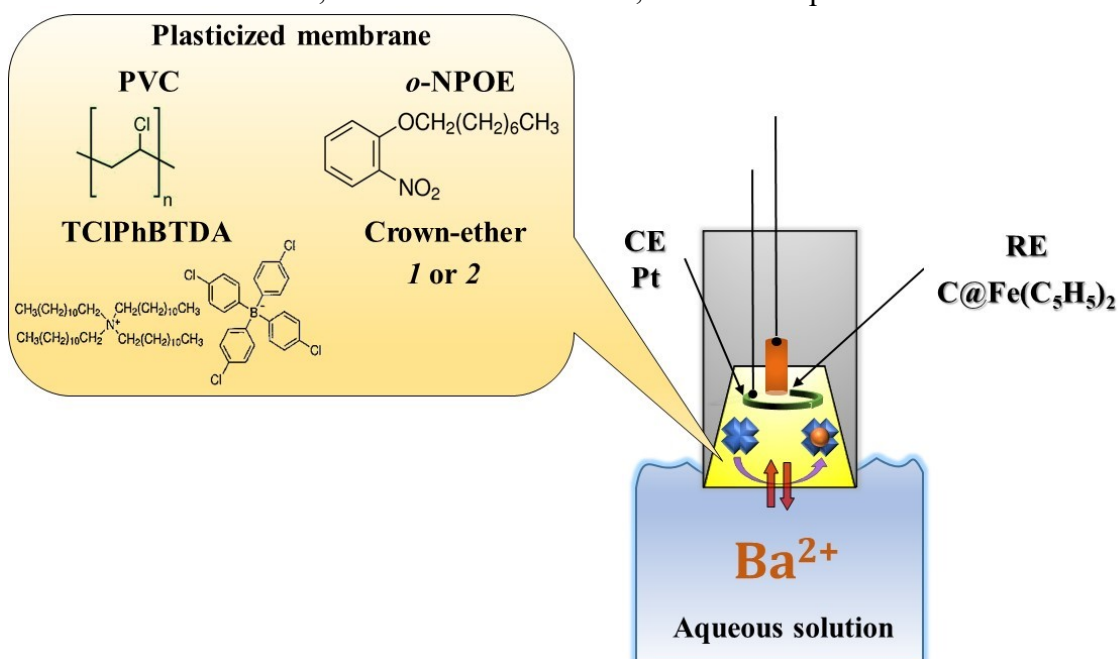

**Figure S25.** Schematic representation of the AISE with PVC-2-NPOE gel membrane used for voltametric measurements of the interphase Ba<sup>2+</sup> transfer: RE – reference electrode, CE – counter electrode.

Electrochemical measurements were performed by means of cyclic DC voltammetry using four electrodes. A 10 mM aqueous solution of LiCl was used as the supporting electrolyte in the aqueous phase. The reference electrode in the aqueous phase was a 3.5 M silver chloride electrode, the outer cavity was filled up with a 10 mM LiCl solution. The counter one was a platinum electrode. Electrochemical cell, employed for the studying of the process of complexation, is schematically represented in Fig. S26.

|                       |                                                 | <b>Organic membrane:</b>                                                                         | <b>Aqueous solution under study:</b> |               |                       |    |
|-----------------------|-------------------------------------------------|--------------------------------------------------------------------------------------------------|--------------------------------------|---------------|-----------------------|----|
| C <sub>graphite</sub> | Fe(C <sub>5</sub> H <sub>5</sub> ) <sub>2</sub> | <i>o</i> -NPOE<br>PVC (8 wt.%)<br>10 <sup>-2</sup> M TCIPhBTDA,<br>8-12 mM CE 1/ 2-12<br>mM CE 2 | 10 mM LiCl<br>+ x M Ba <sup>2+</sup> | 10 mM<br>LiCl | AgCl,<br>3.5 M<br>KCl | Ag |



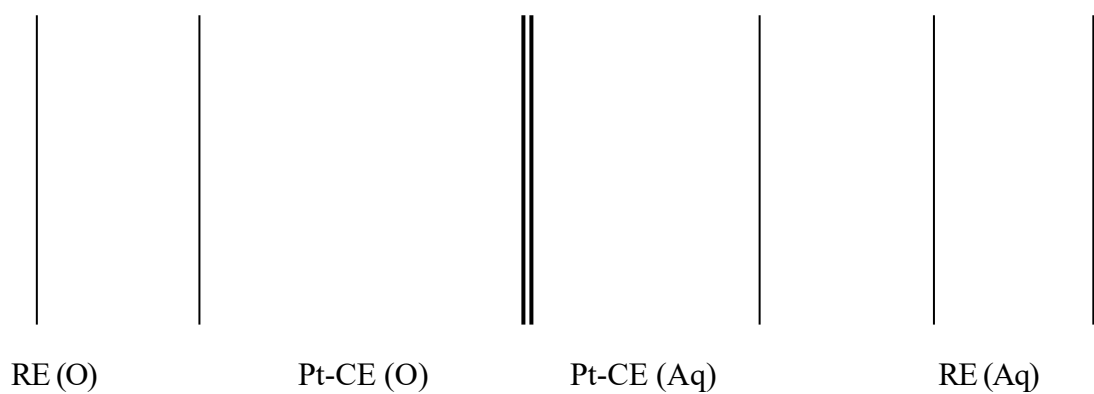

**Figure S26.** Chart of PCV-2-NPOE membrane based amperometric ion-selective electrode for voltamperometric measurements of  $\text{Ba}^{2+}$  phase-transfer. (RE – reference electrode; CE – counter electrode)
